# 1 **Data-driven approaches for Tau-PET imaging biomarkers in**

## 2 **Alzheimer's disease**

3 Jacob W. Vogel, BA<sup>1,2\*</sup>, Niklas Mattsson, MD, PhD<sup>3,4,5</sup>, Yasser Iturria-Medina, PhD<sup>1</sup>, T.  
4 Olof Strandberg, PhD<sup>3</sup>, Michael Schöll, PhD<sup>3,6</sup>, Christian Dansereau, PhD<sup>7,8</sup>, Sylvia  
5 Villeneuve, PhD<sup>1,9</sup>, Wiesje M. van der Flier, MA<sup>2,10</sup>, Philip Scheltens, MD<sup>2</sup>, Pierre  
6 Bellec, PhD<sup>7,8</sup>, Alan C. Evans, PhD<sup>1</sup>, Oskar Hansson, MD, PhD<sup>3,4#</sup>, Rik Ossenkoppele,  
7 PhD<sup>2,3#</sup>, the Alzheimer's Disease Neuroimaging Initiative\*\* & the Swedish BioFINDER  
8 study

9

10 <sup>1</sup> Montreal Neurological Institute, McGill University, Montreal, QC, Canada

11 <sup>2</sup> Alzheimer Center and Department of Neurology, VU University medical center, Amsterdam  
12 Neuroscience, Amsterdam, Netherlands

13 <sup>3</sup> Clinical Memory Research Unit, Lund University, Lund, Sweden

14 <sup>4</sup> Memory Clinic, Skåne University Hospital, Lund, Sweden

15 <sup>5</sup> Department of Neurology, Skåne University Hospital, Lund, Sweden

16 <sup>6</sup> Wallenberg Centre for Molecular and Translational Medicine, University of Gothenburg,  
17 Gothenburg, Sweden

18 <sup>7</sup> Department of Computer Science and Operations research, Université de Montréal, Montreal,  
19 QC, Canada

20 <sup>8</sup> Centre de Recherche de l'Institut Universitaire de Gériatrie de Montréal, University of Montreal,  
21 Montreal, QC, Canada

22 <sup>9</sup> Department of Psychiatry, McGill University, Montreal, QC, Canada

23 <sup>10</sup> Department of Epidemiology and Biostatistics, VU University medical center, Amsterdam,  
24 Netherlands

25

26 # Both authors contributed equally to this work.

27

28 \* Corresponding author

29 Jacob W. Vogel

30 [jacob.vogel@mail.mcgill.ca](mailto:jacob.vogel@mail.mcgill.ca)

31 McGill Centre for Integrative Neuroscience

32 Montreal Neurological Institute, Room NW145

33 3801 Boulevard Robert-Bourassa

34 Montreal, QC H3A 2B4

35 Canada

36

37 \*\* Data used in preparation of this article were obtained from the Alzheimer's Disease Neuroimaging  
38 Initiative (ADNI) database ([adni.loni.usc.edu](http://adni.loni.usc.edu)). As such, the investigators within the ADNI contributed to  
39 the design and implementation of ADNI and/or provided data but did not participate in analysis or writing  
40 of this report. A complete listing of ADNI investigators can be found at: [http://adni.loni.usc.edu/wp-](http://adni.loni.usc.edu/wp-content/uploads/how_to_apply/ADNI_Acknowledgement_List.pdf)  
41 [content/uploads/how\\_to\\_apply/ADNI\\_Acknowledgement\\_List.pdf](http://adni.loni.usc.edu/wp-content/uploads/how_to_apply/ADNI_Acknowledgement_List.pdf)

## 42 **ABSTRACT**

43 Previous positron emission tomography (PET) studies have quantified filamentous tau  
44 pathology using regions-of-interest (ROIs) based on observations of the topographical  
45 distribution of neurofibrillary tangles in post-mortem tissue. However, such approaches  
46 may not take full advantage of information contained in neuroimaging data. The present  
47 study employs an unsupervised data-driven method to identify spatial patterns of tau-PET  
48 distribution, and to compare these patterns to previously published “pathology-driven”  
49 ROIs. Tau-PET patterns were identified from a discovery sample comprised of 123  
50 normal controls and patients with mild cognitive impairment or Alzheimer’s disease  
51 (AD) dementia from the Swedish BioFINDER cohort, who underwent [ $^{18}\text{F}$ ]AV1451 PET  
52 scanning. Associations with cognition were tested in a separate sample of 90 individuals  
53 from ADNI. BioFINDER [ $^{18}\text{F}$ ]AV1451 images were entered into a robust voxelwise  
54 stable clustering algorithm, which resulted in five clusters. Mean [ $^{18}\text{F}$ ]AV1451 uptake in  
55 the data-driven clusters, and in 35 previously published pathology-driven ROIs, was  
56 extracted from ADNI [ $^{18}\text{F}$ ]AV1451 scans. We performed linear models comparing  
57 [ $^{18}\text{F}$ ]AV1451 signal across all 40 ROIs to tests of global cognition and episodic memory,  
58 adjusting for age, sex and education. Two data-driven ROIs consistently demonstrated  
59 the strongest or near-strongest effect sizes across all cognitive tests. Inputting all regions  
60 plus demographics into a feature selection routine resulted in selection of two ROIs (one  
61 data-driven, one pathology-driven) and education, which together explained 28% of the  
62 variance of a global cognitive composite score. Our findings suggest that [ $^{18}\text{F}$ ]AV1451-  
63 PET data naturally clusters into spatial patterns that are biologically meaningful and that  
64 may offer advantages as clinical tools.

## 65 1. INTRODUCTION

66 Alzheimer's disease (AD) is neuropathologically defined by the presence of  
67 widespread extracellular plaques containing amyloid- $\beta$  and intracellular neurofibrillary  
68 tangles consisting of aggregated tau proteins [Braak and Braak, 1991; Masters et al.,  
69 1985]. While amyloid- $\beta$  may be present decades prior to symptom onset [Jansen et al.,  
70 2015], the presence of neocortical tau is temporally more closely related to current  
71 cognitive status and degree of neurodegeneration, as convincingly demonstrated by  
72 studies utilizing post-mortem tissue, animal models, cerebrospinal fluid and, more  
73 recently, the positron emission tomography (PET) tracer [ $^{18}\text{F}$ ]AV1451 [Arriagada et al.,  
74 1992; Bejanin et al., 2017; Cho et al., 2017; Nelson P. T. et al, 2013; Ossenkoppele et al.,  
75 2016; Van Rossum et al., 2012]. [ $^{18}\text{F}$ ]AV1451 binds paired helical filaments of tau with  
76 high affinity and selectivity [Chien et al., 2013; Lowe et al., 2016; Marquié et al., 2015;  
77 Marquié et al., 2017; Xia et al., 2013], and can be used to investigate the distribution of  
78 tau pathology in the living human brain. Several studies have shown strong spatial  
79 resemblance between *in vivo* tau PET patterns and neuropathological staging of  
80 neurofibrillary tangles as proposed by Braak and Braak [Cho et al., 2016; Schöll et al.,  
81 2016; Schwarz et al., 2016], reflecting prototypical progression from (trans)entorhinal  
82 (stage I/II) to limbic (stage III/IV) to isocortical (stage V/VI) regions [Braak and Braak,  
83 1991]. Furthermore, regional [ $^{18}\text{F}$ ]AV1451 retention co-localizes with sites of brain  
84 atrophy or hypometabolism [Ossenkoppele et al., 2016; Xia et al., 2017] and has been  
85 associated with impairments in specific cognitive domains [Bejanin et al., 2017; Cho et  
86 al., 2017; Ossenkoppele et al., 2016].

87

88           Given this strong regional specificity of tau pathology, it is important to consider  
89 how regions-of-interest (ROIs) are defined, as they could potentially impact study  
90 outcomes. To date, most studies employing tau-PET tracers involved ROIs constructed  
91 based on neuropathological studies. For example, some studies mimicked the Braak  
92 stages *in vivo* [Cho et al., 2016; Schöll et al., 2016; Schwarz et al., 2016], while others  
93 selected specific regions reflecting early (e.g. entorhinal cortex) or more advanced (e.g.  
94 inferior temporal cortex) disease stages [Johnson et al., 2016]. These approaches have  
95 several advantages as they are supported by fundamental research and enhance  
96 generalizability across studies. However, compared to neuroimaging, neuropathological  
97 data typically include only a few slices in a constrained number of brain regions, and  
98 brain tissue is affected by death [Scheltens and Rockwood, 2011]. Additionally, tau PET  
99 signal does not equal presence of tau pathology. There are several sources of  
100 [<sup>18</sup>F]AV1451 signal and noise, including target binding, off-target binding (e.g.  
101 Monamine oxidase, neuromelanin, vascular lesions, iron), non-specific binding and  
102 imaging related noise (e.g. partial volume effects) [Choi et al., 2017; Harada et al., 2018;  
103 Ikonomic et al., 2016; Lockhart et al., 2017; Lowe et al., 2016; Marquié et al., 2015;  
104 Ng et al., 2017; Schöll et al., 2016]. An alternative approach could therefore be to select  
105 ROIs based on data-driven approaches [Dickerson et al., 2011; Grothe et al., 2017;  
106 Landau et al., 2011; Pankov et al., 2016], thereby taking full advantage of the abundance  
107 of information contained in neuroimaging data, but also accounting for the idiosyncrasies  
108 of PET imaging data.

109           In light of ongoing efforts to define appropriate ROIs and determine tau PET-  
110 positivity, it is important to compare data-driven approaches (agnostic, “where is the

111 tau?”) with theory-derived ROIs based on post-mortem studies (directed, “is the tau  
112 here?”). In the present study, we applied an unsupervised algorithm to identify clusters of  
113 [<sup>18</sup>F]AV1451 signal and compared the spatial patterns of these clusters with  
114 neuropathologically derived ROIs described in previous publications. As a secondary  
115 analysis, we tested which ROIs best correlated with global cognition in an independent  
116 cohort of cognitively normal, mild cognitive impairment and AD dementia subjects. We  
117 hypothesized that our data-driven approach would corroborate neuropathological  
118 findings, but would also present novel information leading to enhanced associations with  
119 cognition.

120

## 121 **2. MATERIALS AND METHODS**

### 122 **2.1 Participants**

123 Two separate cohorts were included in this study. Participants from the Swedish  
124 BioFINDER study were used to perform clustering analysis on [<sup>18</sup>F]AV1451 data,  
125 whereas participants from the Alzheimer’s Disease Neuroimaging Initiative (ADNI) were  
126 used to test associations between the clustering-derived ROIs and cognition. This design  
127 allowed us to not only probe the patterns of spatial covariance of [<sup>18</sup>F]AV1451, but also  
128 to assess these utility of these patterns as a general [<sup>18</sup>F]AV1451 biomarker without  
129 concern of overfitting or “double-dipping” (c.f. [Kriegeskorte et al., 2009]).

130 Demographic, clinical and biomarker information for both cohorts are presented in Table  
131 1.

132 The BioFINDER cohort is a multi-site study designed for the purpose of  
133 developing biomarkers for neurodegenerative diseases. More information can be found at

134 <http://biofinder.se>. Study participants included 55 subjects with normal cognition, 21 with  
135 mild cognitive impairment (MCI), and 47 with Alzheimer's dementia, who had complete  
136 MRI and [<sup>18</sup>F]AV1451 PET data (Table 1). Patients with MCI were referred to a memory  
137 clinic and demonstrated objective cognitive impairment that could not be explained by  
138 another condition. AD dementia patients met criteria for the DSM-V [American  
139 Psychiatric Association, 2013] and NINCDS-ADRDA [McKhann et al., 2011] for  
140 probable AD, established by clinicians blinded to PET data. To optimize overlap with the  
141 ADNI cohort, dementia patients were only included if they presented with an amnesic-  
142 predominant phenotype. Both dementia and MCI patients were only included in this  
143 study if they demonstrated abnormal A $\beta$ 1-42 levels in the CSF (INNOTEST, cut-off: 650  
144 ng/l; Palmqvist *et al.*, 2015). The sample of controls selected for [<sup>18</sup>F]AV1451 scanning  
145 was intentionally enriched for  $\beta$ -amyloid positivity to include people in the preclinical  
146 stage of AD (see Table 1). This enrichment was achieved by ensuring that 50% of the  
147 cognitively normal participants invited for [<sup>18</sup>F]AV1451 imaging had shown positive  
148 PET or CSF  $\beta$ -amyloid measurements at previous visits. PET imaging for the study was  
149 approved by the Swedish Medicines and Products Agency and the local Radiation Safety  
150 Committee at Skåne University Hospital, Sweden. All participants provided written  
151 informed consent according to the Declaration of Helsinki, and ethical approval was  
152 given by the Ethics Committee of Lund University, Lund, Sweden.

153 ADNI is a multi-site open access dataset designed to accelerate the discovery of  
154 biomarkers to identify and track AD pathology ([adni.loni.usc.edu/](http://adni.loni.usc.edu/)). The current study  
155 included all ADNI individuals with complete [<sup>18</sup>F]AV1451 scans that were available in

156 November, 2016. This included 43 cognitively normal elderly controls, 37 patients with  
157 MCI, and 10 patients with a recent diagnosis of Alzheimer's dementia (Table 1).  
158 In addition to imaging data, age, sex, education, diagnosis, amyloid- $\beta$  status on  
159 [ $^{18}\text{F}$ ]florbetapir PET [Landau et al., 2013], and scores from six tests measuring global  
160 cognition or activities of daily living were downloaded from the ADNI-LONI website  
161 ([adni.loni.usc.edu](http://adni.loni.usc.edu)). The cognitive tests were as follows: Mini-Mental State Examination  
162 (MMSE) [Folstein et al., 1975]; Clinical Dementia Rating Sum of Boxes (CDRSB)  
163 [Hughes et al., 1982]; Alzheimer's disease Assessment Scale 11 (ADAS11) [Rosen et al.,  
164 1984] and 13 (ADAS13) [Mohs et al., 1997]; Everyday Cognition (ECog) [Farias et al.,  
165 2008]; Functional Activities Questionnaire (FAQ) [Pfeffer et al., 1982]. We also  
166 downloaded the ADNI-MEM score, an episodic memory composite score provided by  
167 ADNI [Crane et al., 2012].

168

## 169 **2.2 Imaging**

170 [ $^{18}\text{F}$ ]AV1451 images were processed using separate but nearly identical pipelines across  
171 the two cohorts. Acquisition and processing procedures for [ $^{18}\text{F}$ ]AV1451 processing in  
172 the BioFINDER cohort has been described elsewhere [Hansson et al., 2017]. Scans were  
173 reconstructed into 5-min frames and motion corrected using AFNI's 3dvolreg  
174 <https://afni.nimh.nih.gov/>. Mean [ $^{18}\text{F}$ ]AV1451 images were created over a time-window  
175 of 80-100 minutes post-injection, and these images were coregistered to each subject's  
176 T1 image in native space. Mean images were then intensity normalized using a complete  
177 cerebellar gray reference region to create standard uptake value ratio (SUVR) images.  
178 Coregistered MRI images were normalized to the MNI-ICBM152 template using

179 Advanced Normalization Tools (<https://stnava.github.io/ANTs/>) and the transformation  
180 parameters were applied to the SUVR images. Finally, SUVR images were smoothed  
181 with an 8mm FWHM Gaussian filter.

182 For the ADNI cohort, mean 80-100 min [ $^{18}\text{F}$ ]AV1451 images, as well as  
183 MPRAGE images closest to [ $^{18}\text{F}$ ]AV1451 scans, were downloaded from the ADNI-LONI  
184 website. Details on acquisition procedures for these [ $^{18}\text{F}$ ]AV1451 and MRI images can be  
185 found elsewhere (<http://adni.loni.usc.edu/methods/documents/>). [ $^{18}\text{F}$ ]AV1451 images  
186 were processed in accordance to procedures described in [Schöll et al., 2016]. Briefly, T1  
187 images were processed using Freesurfer v5.3 and [ $^{18}\text{F}$ ]AV1451 images were coregistered  
188 to native T1s using Statistical Parametric Mapping 12 ([www.fil.ion.ucl.ac.uk/spm/](http://www.fil.ion.ucl.ac.uk/spm/)).  
189 SUVR images were created using a cerebellar gray reference region and images were  
190 normalized to MNI space using the parameters from the coregistered T1. Figure 1 shows  
191 mean [ $^{18}\text{F}$ ]AV1451 SUVR images stratified by diagnosis and amyloid status for each  
192 cohort.

193

### 194 **2.3 Clustering of [ $^{18}\text{F}$ ]AV1451 data**

195 Our primary analysis involved the derivation of data-driven ROIs by using unsupervised  
196 machine learning to elucidate stable patterns of [ $^{18}\text{F}$ ]AV1451 signal covariance across a  
197 cognitively diverse dataset. Cross-subject [ $^{18}\text{F}$ ]AV1451-PET covariance networks were  
198 derived from all 123 BioFINDER [ $^{18}\text{F}$ ]AV1451 images using an open-source  
199 unsupervised consensus-clustering algorithm called Bootstrap Analysis of Stable Clusters  
200 (BASC; Figure 2) [Bellec et al., 2010]. BASC is a two-step consensus-clustering  
201 algorithm that enhances the stability of the clustering process by repeatedly clustering



202 bootstrapped samples of the input data, and deriving the final partition from this stability  
203 matrix, rather than the original data (c.f. [Fred and Jain, 2005]). This approach offers two  
204 advantages in the context of this study. First, the stochastic nature of many clustering  
205 algorithms tends to lead to different solutions depending on their initialization state,  
206 whereas BASC performs clustering on a stability matrix generated from many solutions  
207 (and thus many initializations). This leads to greater reproducibility in the clustering  
208 solutions generated by BASC. Second, because the initial set of clustering analyses is  
209 performed on bootstrap samples of the input data, the final solution is less dependent on  
210 the clinical composition of the input data.

211 BASC was adapted to 3D [ $^{18}\text{F}$ ]AV1451 data by stacking all 123 BioFINDER  
212 [ $^{18}\text{F}$ ]AV1451 images along a fourth (subject) dimension, creating a single 4D image to be  
213 submitted as input. BASC first reduces the dimensions of the data with a previously  
214 described region-growing algorithm [Bellec et al., 2006], which was set to extract  
215 spatially constrained atoms (small regions of redundant signal) with a size threshold of  
216  $1000\text{mm}^3$ . In order to reduce computational demands, the Desikan-Killiany atlas  
217 [Desikan et al., 2006] was used as a prior for region constraint, and the data was masked  
218 with a liberal gray matter mask, which included the subcortex but had the cerebellum  
219 manually removed (since this was used as the reference region for [ $^{18}\text{F}$ ]AV1451 images).  
220 The region-growing algorithm resulted in a total of 730 atoms, which were included in  
221 the BASC algorithm. BASC next performs recursive k-means clustering on bootstrapped  
222 samples of the input data. After each clustering iteration, information about cluster  
223 membership is stored as a binarized adjacency matrix. The adjacency matrices are  
224 averaged resulting in a stability matrix representing probabilities of each pair of atoms

225 clustering together (Figure 2). Finally, hierarchical agglomerative clustering with Ward  
226 criterion is applied to the stability matrix, resulting in the final clustering solution. The  
227 process is repeated over several clustering solutions (k=1 - 50), and the MSTEPs method  
228 [Bellec, 2013] was implemented to find the most stable clustering solutions at different  
229 resolutions. In the interest of multiple comparisons, and similarity to Braak  
230 neuropathological staging (i.e. six ROIs), we chose the lowest resolution solution for  
231 subsequent analysis (though the other two solutions are visualized). Note that no size  
232 constraints were imposed on clustering solutions (except at the level of atom-size in the  
233 region-growing – see above). Cluster-cores were determined as voxels where cluster  
234 probability membership exceeded 0.5 (BASC default setting), eliminating unstable  
235 voxels from analysis [Bellec et al., 2010; Garcia-Garcia et al., 2018]. After determining  
236 cluster-cores in the BIOFINDER cohort, we extracted the average [ $^{18}\text{F}$ ]AV1451 SUVR  
237 for each cluster core from all ADNI subjects, and these values were used for subsequent  
238 analysis investigating associations with cognition.

239         The choice of the k-means algorithm for the initial clustering and hierarchical  
240 clustering with ward criterion for partitioning the stability matrix are somewhat arbitrary.  
241 K-means is a particularly fast algorithm and therefore lends itself well to bootstrapping.  
242 Meanwhile, the hierarchical clustering routine used in BASC is an appropriate algorithm  
243 for the stability matrix, which is a similarity matrix, and it provides solutions at multiple  
244 resolutions making it amenable to the BASC framework [Bellec et al., 2010]. Both  
245 algorithms are standard, well validated, simple and involve few free parameters. This  
246 latter point is important, as BASC itself only has a few principle parameters: namely the  
247 number of clusters to extract (in this case, determined by MSTEPs), the number of

248 bootstrap samples (in this case, 500), and the size of the bootstrap sample (in this case,  
249 the length of the input data – 123 cases) [Bellec et al., 2010; Orban et al., 2015]. Other  
250 parameters are associated with some of the steps peripheral to the central BASC  
251 algorithm, namely the region growing preprocessing step and MSTEPS algorithm to  
252 determine the number of clusters, and these parameters were left to their default settings.  
253 Briefly, the region growing includes a threshold parameter limiting the maximum size of  
254 “atoms”, which is mostly related to computational demand. Meanwhile, MSTEPS works  
255 on a sparse grid and includes a parameter specifying the percentage of variance  
256 maintained (similar to PCA). In addition, MSTEPS allows the definition of the size of the  
257 window within which stable clusters are sought [Bellec, 2013].

258

#### 259 **2.4 Definition of Braak stage ROIs described in other studies**

260 A number of studies have created ROIs mirroring the Braak stages described from  
261 pathological studies. To test the utility of our data-driven ROIs vis-à-vis those defined in  
262 correspondence to the pathological literature, we recreated the Braak ROIs described in  
263 three different studies [Cho et al., 2016; Schöll et al., 2016; Schwarz et al., 2016]. Schöll,  
264 Lockhart et al. and Cho et al. were constructed using regions from the Desikan-Killiany  
265 atlas, and we recreated these ROIs in direct correspondence to what has been reported in  
266 these two studies. Schwarz et al. instead generated small ROIs designed to mirror the  
267 slabs of cerebral cortex extracted during autopsy for Braak staging. These regions were  
268 constructed with a script generously provided by the authors. For all analyses, Braak  
269 ROIs were included both individually (“single”) and cumulatively (“stage”). For  
270 example, for Braak Stage III, one ROI was created containing all regions from Braak I,

271 II, and III included (“stage”), as well as a ROI created including only regions in Braak III  
272 (“single”). Finally, some studies have chosen to use only the bilateral inferior temporal  
273 lobe from the Desikan-Killiany atlas to summarize global tau burden [Johnson et al.,  
274 2016], so we included this region in subsequent analysis as well. Studies also frequently  
275 used the bilateral entorhinal cortex from this atlas, and it should be noted that this region  
276 is also included, namely as Stage I from Cho et al. and Schöll, Lockhart et al. Size-  
277 weighted average [ $^{18}\text{F}$ ]AV1451 SUVR was extracted for each ROI (35 in total) for each  
278 subject.

279

## 280 **2.5 Similarity between data-driven clusters, anatomical ROIs and Braak**

### 281 **Stage ROIs**

282 We compiled descriptive information about the similarity between our cluster-  
283 derived ROIs and the Braak ROIs from the literature. For comparisons to regions from  
284 Schöll, Lockhart et al. and Cho et al., we used normalized mutual information. Due to the  
285 small size of the Schwarz et al. regions, comparisons involved measuring the percentage  
286 of each Schwarz ROI falling inside of each cluster-derived ROI.

287

## 288 **2.6 Reproducibility of [ $^{18}\text{F}$ ]AV1451 clustering solution**

289 After clustering [ $^{18}\text{F}$ ]AV1451 data using BASC (section 2.3), we assessed  
290 whether we could reproduce these clusters in a separate dataset. BASC was therefore run  
291 on 90 [ $^{18}\text{F}$ ]AV1451 scans from ADNI with the exact same parameters used for the  
292 BioFINDER dataset. MSTEPS was again used to define the number of clusters. In order  
293 to compare the clustering solution to the solution found in the BioFINDER sample, we

294 matched clusters from the ADNI sample to the most spatially similar clusters from the  
295 BioFINDER sample, and harmonized the numeric labels between the two solutions. As a  
296 qualitative analysis, we extracted voxels that were part of the same cluster in both  
297 clustering solutions. The resulting voxels can be thought to represent regions that  
298 demonstrated consistent clustering behavior ( $[^{18}\text{F}]\text{AV1451}$  signal covariance) across the  
299 two samples. For each cluster, we calculated the Dice coefficient representing within-  
300 cluster agreement between the two clustering solutions. We also performed the same  
301 analyses constrained within the cluster-cores from the BioFINDER solution, assuming  
302 the agreement should be higher within the cores. We also calculated both the adjusted  
303 Rand index and adjusted mutual information score (passing the BioFINDER solution as  
304 the “true labels”) as a measurement of overall consistency between the two clustering  
305 solutions. To put these measurements into context, we performed five 50% splits of the  
306 ADNI data and compared clustering solutions between each split. The purpose of this  
307 analysis was to identify whether clustering within the ADNI dataset showed greater or  
308 less stability compared to the stability between the ADNI and BioFINDER datasets.

309

## 310 **2.7 Statistical Analysis**

311 Our secondary analyses were aimed to assess the utility and generalizability of  
312 our data-driven covariance networks. We performed linear models between these  
313 covariance networks and the scores from six different available test scores assessing  
314 global cognition and function (see Table S1). In addition, the scores were summarized  
315 using Principal Components Analysis (PCA) using Singular Value Decomposition. The  
316 PCA was fit to data from the six cognitive test scores, which were scaled to a 0 mean

317 with unit variance. The first component explained 72% of the total model variance, and  
318 was used to transform the cognitive data into a single Global Cognition composite score.  
319 For each of the cognitive tests, as well as the composite score, separate general linear  
320 models for each ROI (40 in total; our five data-driven clusters and 35 ROIs from the  
321 literature) were constructed with cognitive test score as the dependent variable and age,  
322 sex and education as covariates. We repeated this analysis for the ADNI-MEM score to  
323 test the relationship between [<sup>18</sup>F]AV1451 and episodic memory in all 40 ROIs. Tests  
324 surviving Bonferroni correction for multiple comparisons are reported.

325 In order to identify a sparse set of non-redundant covariates that best describe the  
326 global cognitive data in ADNI, we submitted all 40 tau ROIs plus age, sex and education  
327 to a Least Absolute Shrinkage and Selection Operator (Lasso) regression-based feature  
328 selection routine. The Lasso uses L1 regularization (coordinate descent) to penalize  
329 regression coefficients based on their maximum likelihood estimates, and is therefore an  
330 optimal approach to select a small number of variables from a large number of collinear  
331 covariates. In the current implementation, the degree of penalization is optimized using  
332 10-fold cross-validation. All tau ROIs and demographics were scaled to be mean-  
333 centered with unit variance, and entered into the Lasso regression model with the Global  
334 Cognition composite score as the dependent variable. Features selected by the Lasso  
335 (absolute beta > 0.25) were entered together into a general linear model (GLM) with  
336 MMSE as the dependent variable. Additionally, to ensure our results were representative  
337 of global cognition and not specific to the composite score, the fitted values from this  
338 GLM were used to predict scores of each of the six cognitive tests. Finally, the Lasso was  
339 repeated separately for each of the individual test as well.

340 With the exception of BASC, all statistics were implemented using the pandas,  
341 numpy, scipy and scikit-learn [Pedregosa et al., 2012] packages in Python 3.5.2  
342 (<https://www.python.org/>).

343

### 344 **3. RESULTS**

#### 345 **3.1 Participant Characteristics**

346 Table 1 contains demographic information, MMSE scores and amyloid positivity  
347 rates for both the ADNI and BioFINDER sample. The sample used for clustering  
348 (BioFINDER) demonstrated important differences compared to the sample used for  
349 testing (ADNI). BioFINDER subjects were less highly educated across the whole sample,  
350 and BioFINDER controls were on average older than ADNI controls. Additionally, the  
351 BioFINDER sample demonstrated lower MMSE scores across the whole sample  
352 compared to ADNI, including within MCI and dementia groups. Finally, 45% of ADNI  
353 subjects were amyloid-positive vs. 73% of BioFINDER subjects, which was primarily  
354 related to the fact that only amyloid positive MCI patients were included in the  
355 BioFINDER sample.

356

#### 357 **3.2 Data-driven Tau-PET covariance networks**

358 123 BioFINDER [ $^{18}\text{F}$ ]AV1451 scans were entered into an advanced clustering  
359 algorithm in order to identify networks of regional [ $^{18}\text{F}$ ]AV1451 signal covariance across  
360 subjects. The MSTEPS algorithm identified five-, nine- and 32-cluster solutions as  
361 optimal solutions. The parcellations generated from the three stable clustering solutions  
362 are visualized in Supplementary Figure S1. For the purposes of comparing with Braak

363 stage ROIs, we chose the lowest-resolution solution (k=5) for subsequent analyses,  
364 visualized in Figure 2. The clusters were interpreted and named as follows: “1:  
365 Subcortical”, “2: Frontal”, “3: Medial/Anterior/Inferior Temporal”, “4: Temporo-  
366 parietal” and “5: Unimodal Sensory”. Cluster 3 bore resemblance to regions often  
367 involved in early tau aggregation and atrophy [Braak and Braak, 1991], while Cluster 4  
368 also appeared similar to regions commonly associated with neurodegeneration in AD  
369 [Dickerson et al., 2011; Landau et al., 2011]. Of note, the hippocampus was largely  
370 unrepresented in any of the cluster-cores, though some voxels in the head of the  
371 hippocampus were included in Cluster 3, and a few distributed voxels were included in  
372 Cluster 1 (Subcortex). However, using a winner-takes-all clustering approach, the voxels  
373 in the hippocampus were almost equally distributed between Cluster 1 and Cluster 3.

374

### 375 **3.3 Similarity to Braak ROIs**

376 Descriptive metrics were used to quantify the spatial similarity between the data-driven  
377 covariance networks and the Braak Stage ROIs introduced in the literature (Figure 3).  
378 Cluster 5 (“Unimodal Sensory”) demonstrated a high degree of overlap with Braak Stage  
379 VI across all region sets. Spatial similarity was also evident between Cluster 3  
380 (“Medial/Anterior/Inferior Temporal”) and Stage I-IV from Cho et al., and this cluster  
381 almost completely circumscribed Stages I-III from Schwarz et al. Cluster 1 (“Subcortex”)  
382 was most similar to Schöll, Lockhart et al. Stage II, due in part to its inclusion of the  
383 hippocampus. Little spatial similarity was evident between Cluster 2 (“Frontal”) and any  
384 of the Braak Stage ROIs, though some similarity was seen with the Stage V region from  
385 Schöll, Lockhart et al. and Cho et al. due to their inclusion of many frontal lobe



386 structures. Similarly, Cluster 4 (“Temporo-parietal”) did not demonstrate strong spatial  
387 similarity to any of the Braak ROIs, though it did partially overlap with the Braak single  
388 IV and V regions from Schwarz et al.

389

### 390 **3.4 Associations with cognition in ADNI**

391 General linear models were run in the ADNI dataset assessing associations  
392 separately between each of 40 tau ROIs (our five data-driven clusters established in the  
393 BioFINDER study, and 35 ROIs from the literature) and a Global Cognitive composite  
394 score, controlling for age, sex and education (Figure 4). [<sup>18</sup>F]AV1451 signal in several  
395 ROIs demonstrated strong associations with global cognition, though only the data-driven  
396 Cluster 4 (“Temporo-parietal”;  $\beta = -3.24$  [SE=0.91],  $t = -3.43$ ,  $p < 0.001$ ) survived  
397 multiple comparisons.

398 To ensure our results were not specific to the Global Cognition composite score,  
399 we repeated this analysis using the six individual measures of global cognition and  
400 function that composed the composite score (Table S1). The data-driven Cluster 4  
401 (“Temporo-parietal”) described global cognition better than all other ROIs using four of  
402 the six cognitive measures, and was in the top five for all of them. Across all cognitive  
403 measures, Clusters 4 and 3 (“Medial/anterior/inferior temporal”) ranked best and second  
404 best, respectively, at describing global cognitive data (Figure 5). Notably, the Schwarz  
405 Stage I ROI also performed well across cognitive measures, except for the MMSE.

406 Finally, since many ADNI subjects had either MCI or were at early stages of  
407 dementia and may not show great variation in tests of global cognition scores, we  
408 repeated the above analysis substituting global cognition with a composite measure of

409 episodic memory. (Table S2) shows the top five ROIs with the strongest associations  
410 with episodic memory. Although none of the associations survived correction for  
411 multiple comparisons, the strongest associations were found with early stage pathological  
412 ROIs (resembling (trans)enthorinal cortex), followed by the data-driven temporo-parietal  
413 ROI.

414

### 415 **3.5 Identifying a combinatorial tau-PET biomarker for cognition**

416 Next, all tau ROIs were entered into a Lasso regression model in order to identify  
417 a sparse set of covariates that best describe global cognitive data (Figure 6). The optimal  
418 penalization value was defined through cross-validation as 0.019. The Lasso reduced all  
419 coefficients except Cluster 4 (“Temporo-parietal”), Braak Stage VI from Schwarz et al.,  
420 and education. These three variables were entered together into a general linear model,  
421 and together explained a much greater proportion of variance in global cognitive data  
422 ( $r^2[4:81] = 0.28, p < 0.0001$ ; Figure 6) compared to the individual effect sizes of each  
423 covariate (highest  $r^2 = 0.12$ ). The earlier negative association between Cluster 4 and  
424 Global Cognition was strengthened ( $t = -4.98, p < 0.001$ ), although positive associations  
425 were seen for the other two covariates (Schwarz Single 6:  $t = 3.61, p = 0.001$ ; Education:  
426  $t = 2.53, p = 0.013$ ). In addition, the fitted values of this GLM explained 18.7 – 26.2% of  
427 the variance in the six individual cognitive tests composing the composite score (all  $p$   
428  $< 0.001$ ), indicating the model generalizes well to individual cognitive tests (Table S3).  
429 Finally, the Lasso feature selection analysis was repeated for the six individual tests of  
430 global cognition. The data-driven Cluster 4 was selected across all six analyses, and was  
431 the only ROI selected for two analyses (Table S4).

432

### 433 **3.6 Reproducibility of tau-PET clusters across datasets**

434         BASC analysis was run a second time on the 90 ADNI [<sup>18</sup>F]AV1451 scans to  
435 establish whether patterns of tau-PET covariance are reproducible across different  
436 datasets. MSTEPS identified a six-cluster solution as the lowest resolution solution in the  
437 ADNI dataset. Five of these clusters demonstrated similar spatial patterns to the five  
438 clusters identified in the BioFINDER sample, while a sixth cluster emerged which  
439 uniformly encircled the entire cerebral cortex (Figure S2). This sixth cluster labeled 18%  
440 of brain voxels, and the average within-cluster [<sup>18</sup>F]AV1451 SUVR was 0.88 (SD =  
441 0.16). The cluster most likely represents a partial volume or non tau-related atrophy  
442 effect, possibly driven by the high proportion of amyloid-negative MCI subjects or the  
443 low number of subjects with extensive isocortical tau in the ADNI cohort.

444         Despite the existence of this sixth cluster and the distinct clinical composition of  
445 the two datasets, some agreement between the two clustering solutions could be observed  
446 (Figure 7). Overall, 35% of brain voxels showed similar clustering patterns between the  
447 two datasets (adjusted Rand index = 0.112; adjusted mutual information score = 0.189).  
448 Figure 7A shows a cortical projection of voxels demonstrating similar clustering behavior  
449 across both datasets. Across datasets, [<sup>18</sup>F]AV1451 spatial covariance was consistent in  
450 the medial and inferior temporal lobes, the primary visual cortex, the temporo-parietal  
451 cortex, the medial frontal lobe, and most acutely in the subcortex. The subcortex formed  
452 its own cluster in both datasets, both including the hippocampus, and overall showed  
453 excellent agreement (Dice coefficient = 0.87). The Dice coefficients in the other clusters  
454 ranged from 0.33 – 0.46 (Figure 4B), indicating that around one third to one half of

455 voxels within clusters showed agreement between the two datasets. Notable regions of  
456 disagreement included the precuneus and posterior cingulate (clustered with the temporal  
457 lobes in ADNI), the insula (clustered with the medial frontal lobe in ADNI), the  
458 sensorimotor cortex and the lateral frontal lobes (distributed across multiple clusters in  
459 ADNI). When restricting the analysis only to voxels contained within the BioFINDER  
460 cluster-cores, the agreement between the two datasets improved (Figure 7B). This  
461 observation was consistent across all clusters except the temporo-parietal cluster, and  
462 provides evidence supporting the notion that voxels that covary stably within datasets  
463 may also show more stable covariance across datasets.

464 For the purposes of comparison, BASC was performed on five random 50% splits  
465 of the ADNI sample, and the resulting partitions were compared to one another. The  
466 average adjusted Rand index across these five within-ADNI train/test splits was 0.166  
467 (SD = 0.031) and the average adjusted mutual information score was 0.225 (SD = 0.021).  
468 These within-dataset scores were equivalent to the between-dataset scores when restricted  
469 to cluster-cores (adjusted Rand index = 0.164; adjusted mutual information score =  
470 0.233).

471

## 472 **4. DISCUSSION**

473 In the present study, we applied an advanced unsupervised algorithm to identify  
474 clusters of [<sup>18</sup>F]AV1451 signal in 123 subjects ranging from cognitively normal to AD  
475 dementia in the Swedish BioFINDER study. Our approach yielded clusters in the  
476 temporoparietal, medial/inferior/anterior temporal, unimodal sensory and frontal cortex,  
477 as well as the subcortex. In an independent sample of 90 subjects (ADNI), we performed

478 general linear models between tests of global cognition and each [<sup>18</sup>F]AV1451 cluster,  
479 adjusting for age, sex and education. In addition, we ran similar models using 35  
480 neuropathologically derived ROIs from previous publications [Cho et al., 2016; Johnson  
481 et al., 2016; Schöll et al., 2016; Schwarz et al., 2016]. Several ROIs exhibited strong  
482 relationships with cognition, though certain data-driven clusters (temporoparietal and  
483 medial/inferior/anterior temporal cortex) appeared to perform slightly but consistently  
484 better than other ROIs in ADNI. Supporting this notion, the temporoparietal data-driven  
485 cluster was among the three most important features (identified by a Lasso regression  
486 model) for predicting global cognition scores. Unsupervised clustering of [<sup>18</sup>F]AV1451  
487 PET data thus revealed the data to self-assemble into stable ROIs resembling well  
488 described vulnerable regions in AD, some of which actually enhanced description of  
489 cognitive data in an independent dataset. This suggests that data-driven approaches to  
490 delineate ROIs may improve clinical utility of [<sup>18</sup>F]AV1451 PET data.

491         The tau-PET covariance networks derived from our clustering approach exhibited  
492 a fair degree of overlap with Braak ROIs derived from autopsy studies, thereby  
493 demonstrating biological relevance. Particularly, Cluster 3 (“Medial/Anterior/Inferior  
494 Temporal”) was reminiscent of regions involved in early tau accumulation, whereas  
495 Cluster 5 (“Unimodal Sensory”) demonstrated a high degree of similarity to regions  
496 involved only in the latest stages of AD. In contrast, Cluster 4 (“Temporo-parietal”) did  
497 not strongly resemble any of the Braak regions, while its pattern, together with the pattern  
498 of Cluster 3, spatially overlapped with cortical regions most vulnerable to  
499 neurodegeneration in AD [Dickerson et al., 2011; Landau et al., 2011]. Furthermore,  
500 signal in the hippocampus was heterogeneous, adding additional evidence that

501 [ $^{18}\text{F}$ ]AV1451 signal in this structure should be interpreted with caution [Cho et al., 2016]  
502 [Choi et al., 2017; Ikonovic et al., 2016]. Similarly, our data-driven approach  
503 suggested that most (but not all) frontal lobe structures exhibited [ $^{18}\text{F}$ ]AV1451 signal  
504 patterns unique to the rest of the cortex. This is notable considering the original Braak  
505 Stage V aggregates frontal lobe structures with many of the temporo-parietal structures  
506 captured in our Cluster 4. Part of the successful description of cognitive data by the data-  
507 driven ROI may be due to its isolation from many of these frontal lobe structures, which  
508 may be contributing signal less informative to AD progression, particularly in early  
509 disease stages. Finally, our data-driven ROIs provide information that may reconcile  
510 some differences between existing Braak ROIs. For example, in our study, [ $^{18}\text{F}$ ]AV1451  
511 signal in the putamen and insula covaried with other regions involved in early tau  
512 accumulation, which was similar to the ROIs described by Schöll, Lockhart et al., but not  
513 Cho et al. (see Table S5 for a summary). However, this pattern was not fully reproduced  
514 within the ADNI sample, and so the staging of different ROIs may require further study  
515 with larger samples.

516         Despite the clusters being derived from a sample with several important and  
517 disease-relevant differences compared to the testing sample, these data-driven ROIs  
518 described global cognitive data slightly better than regions derived from autopsy studies.  
519 While the improvement over the other regions was subtle, the increasing movement  
520 toward the development of biomarkers demands optimization of ROIs to summarize  
521 [ $^{18}\text{F}$ ]AV1451 signal [Frisoni et al., 2017; Maass et al., 2017; Mishra et al., 2017]. As  
522 such, even small improvements are important for studies assessing more subtle effects of  
523 cortical tau accumulation and studies seeking optimal biomarkers for multimodal

524 classification or disease progression [Ota et al., 2015]. The improvement observed is  
525 likely due to the data-driven nature of the method used for derivation of the clusters.  
526 [<sup>18</sup>F]AV1451 may be binding to several off-target agents, such as (neuro)melanin, iron,  
527 vascular pathology and MAO-A/B [Choi et al., 2017; Lowe et al., 2016; Marquié et al.,  
528 2015; Ng et al., 2017], and as such, [<sup>18</sup>F]AV1451 signal is likely a mix of true tau  
529 pathology and other off-target and non-specific signals. Deriving the clusters from a  
530 sample representing a wide breadth of disease stages and additionally including subjects  
531 unlikely to have significant cortical tau pathology enhances the likelihood of isolating  
532 true tau signal, which covaries strongly and in a regionally specific pattern across disease  
533 stages. Additionally, deriving the clusters voxelwise allows freedom from anatomical  
534 borders, which may impose unnecessary constraints irrelevant to the spread of tau.  
535 Finally, despite its many limitations, multi-subject automatic whole-brain sampling is a  
536 distinct advantage of [<sup>18</sup>F]AV1451-PET over pathological studies. This advantage may  
537 further enhance the efficacy of data-driven approaches to ROI generation, which evaluate  
538 regions equally that may otherwise be overlooked.

539         Still, ROIs based on pathology remain important in understanding relationships  
540 between tau burden and cognition. In our study, ROIs representing the earliest stages of  
541 tau pathology, especially the entorhinal cortex, showed the strongest association with  
542 episodic memory in a cohort of individuals with normal cognition, mild cognitive  
543 impairment and early AD dementia. This finding supports previous literature highlighting  
544 relationships between medial temporal lobe tau pathology and decline in episodic  
545 memory [Maass et al., 2018]. However, it is noteworthy that the data-driven temporo-

546 parietal ROI was again among the top performing ROIs in describing episodic memory,  
547 despite the absence of medial temporal lobe structures within this ROI.

548         The results of this study thus suggest a possible advantage of data-driven  
549 approaches in evaluating [<sup>18</sup>F]AV1451 PET data as a biomarker for AD. This study adds  
550 to a rapidly growing body of data-driven [<sup>18</sup>F]AV1451-PET studies that have helped to  
551 characterize features of this tracer in the context of AD. Sepulcre and colleagues  
552 employed a similar unsupervised clustering approach on a set of cognitively intact elderly  
553 individuals, which, similar to our study, revealed [<sup>18</sup>F]AV1451-PET covariance between  
554 regions of early- and later- stage tau accumulation [Sepulcre et al., 2017]. This suggests  
555 these patterns of signal covariance are stable even in the earliest disease stages, lending  
556 credence to the use of data-driven biomarkers in multiple contexts. Meanwhile, Jones et  
557 al. used a data-driven Independent Components Analysis approach to summarize  
558 [<sup>18</sup>F]AV1451 data [Jones et al., 2017]. While the authors concluded the resulting ROIs  
559 represented functional brain networks, three of the ROIs bore a striking similarity to  
560 those generated by our clustering approach. Our approach builds on these previous  
561 studies by assessing relationships between data-driven ROIs and cognition, and by  
562 comparing them with other existing ROIs. Maass et al. employed a series of *a priori* and  
563 supervised data-driven methods to generate [<sup>18</sup>F]AV1451 ROIs and found a relative  
564 equivalence between these ROIs in their association with cognition and a number of other  
565 disease markers [Maass et al., 2017]. However, consistent with our study, Maass et al.  
566 found [<sup>18</sup>F]AV1451 signal to covary most strongly within a specific set of AD  
567 vulnerable-regions, and conclude that these regional measures may perform better than  
568 whole-brain ROIs, particularly regarding associations with cognition.



569           The consistencies across these studies are also underscored by the consistent  
570 patterns of cross-subject [<sup>18</sup>F]AV1451 spatial covariance found across the two datasets in  
571 the current study. Despite the fact that the ADNI cohort had many fewer subjects with  
572 extensive tau burden, and despite differences in the demographic and clinical  
573 characteristics between the ADNI and BioFINDER cohorts, unsupervised clustering of  
574 [<sup>18</sup>F]AV1451 data revealed a level of consistency between these two datasets that rivaled  
575 the consistency of clustering within the ADNI dataset alone. Certain patterns of tau-PET  
576 accumulation emerged in key regions across both cohorts. However, the patterns of tau-  
577 PET covariance were not entirely consistent between the two datasets, which could  
578 reflect true heterogeneity across samples, or could be a matter of instability due to the  
579 relatively small sample sizes (particularly in ADNI). However, better consistency  
580 between datasets was found within the cluster-cores – regions of greatest clustering  
581 stability within the BioFINDER dataset. This finding, alongside the performance of these  
582 cluster-cores as biomarkers in ADNI, suggests some degree of cluster stability may be  
583 achieved with the BASC approach, even with smaller sample sizes.

584           We employed a widely used feature selection routine to identify those regions  
585 most informative in describing association between [<sup>18</sup>F]AV1451 signal and cognitive  
586 data. The feature most strongly associated with global cognition was the data-driven  
587 temporo-parietal cluster, which harbored a strong negative relationship when included  
588 with the other selected features ( $p < 0.001$ ). The feature selection also resulted in the  
589 selection of Schwarz et al. Stage VI and education, both of which associated positively  
590 with MMSE in a general linear model. The finding of an association between education  
591 and MMSE controlling for tau pathology is consistent with the concept of cognitive

592 reserve [Stern, 2012], and suggests that more highly educated subjects may experience  
593 preserved cognition in the face of tau pathology [Hoenig et al., 2017]. While the selection  
594 of Schwarz Stage VI is less obvious, possible explanations include partial volume effects  
595 and age-related off-target or non-specific signal. Because very few ADNI subjects  
596 demonstrate strong [ $^{18}\text{F}$ ]AV1451 signal in this ROI, higher [ $^{18}\text{F}$ ]AV1451 signal may be  
597 related to the presence of more cortex (and thus more off-target or non-specific binding)  
598 rather than increased tau pathology. Similarly, off-target [ $^{18}\text{F}$ ]AV1451 signal in the  
599 cortex and subcortex has been shown to increase with age [Choi et al., 2017; Schöll et al.,  
600 2016; Smith et al., 2016], possibly representing binding to reactive astrocytes [Harada et  
601 al., 2018] or iron deposits [Choi et al., 2017]. Since age was not selected by the Lasso and  
602 therefore was not included in the multivariate model, this may explain the positive  
603 association between these regions and global cognition when accounting for  
604 [ $^{18}\text{F}$ ]AV1451 signal in the temporoparietal region. However, the fact that these ROIs  
605 were selected instead of age suggests they may carry additional cognition-relevant  
606 information, which may demand further exploration. Regardless, the negative  
607 relationship between Cluster 4 (“Temporo-parietal”) and global cognition was  
608 substantially increased after regressing out these other variables. This suggests that  
609 [ $^{18}\text{F}$ ]AV1451-cognition relationships may be enhanced by regressing out off-target or  
610 non-specific signal sources.

611         Our study comes with a number of limitations. First, there were several  
612 differences in characteristics between the two samples. We decided to use the  
613 BioFINDER cohort for clustering given the broad range of both [ $^{18}\text{F}$ ]AV1451 uptake  
614 (Figure 1) and cognitive scores (Table 1). As a consequence, our secondary (cognitive)

615 analysis was performed in subjects from the ADNI cohort with more restricted  
616 [ $^{18}\text{F}$ ]AV1451 uptake and cognitive scores. On a related note, our cluster and results could  
617 be influenced by the composition of our samples. However, voxels are only included in  
618 the clusters derived for our analysis if the clustering occurs across >50% of bootstrap  
619 samples, so it is unlikely that the clustering solution would be strongly driven by, for  
620 example, the high proportion of late-stage (i.e. AD) subjects in the BioFINDER sample.  
621 Third, contrary to other studies, we did not make an attempt to classify individuals  
622 according to stages of tau pathology. Finally, we chose not to apply partial volume  
623 correction on our data. Investigating the impact of such corrections is certainly important,  
624 but we were interested in the natural behavior of tau-PET signal before any corrections.

625 In order to aid future studies, we have made the [ $^{18}\text{F}$ ]AV1451 clusters from this  
626 study available on FigShare (doi = 10.6084/m9.figshare.5758374).

627

628

## 629 **Acknowledgements**

630 Work at the authors' research centers was supported by the European Research Council,  
631 the Swedish Research Council, the Strategic Research Area MultiPark (Multidisciplinary  
632 Research in Parkinson's disease) at Lund University, the Swedish Brain Foundation, the  
633 Swedish Alzheimer Association, the Marianne and Marcus Wallenberg Foundation, the  
634 Skåne University Hospital Foundation, and the Swedish federal government under the  
635 ALF agreement. This research was additionally funded by Marie Curie FP7 International  
636 Outgoing Fellowship [628812] (to R.O.); The donors of [Alzheimer's Disease Research],  
637 a program of BrightFocus Foundation (to R.O.); Author JWV was additionally funded by

638 an Alzheimer Nederland grant and a Vanier Canada Graduate Studies Doctoral award.  
639 The authors would like to thank Emma Wolters, Tessa Timmers, Colin Groot, Angela  
640 Tam, Alle Meije Wink, Anita van Loenhoud and Elena Kochova for advice and support.  
641 The authors would additionally like to thank Adam Schwarz for providing scripts to  
642 recreate the ROIs from Schwarz et al., 2016, and Chul Hyung Lyoo for providing  
643 information about creating ROIs from Cho et al., 2016. AVID Radiopharmaceutical  
644 generously provided the precursor of AV-1451. Data collection and sharing for this project was  
645 funded in part by the Alzheimer's Disease Neuroimaging Initiative (ADNI) (National Institutes of Health  
646 Grant U01 AG024904) and DOD ADNI (Department of Defense award number W81XWH-12-2-0012).  
647 ADNI is funded by the National Institute on Aging, the National Institute of Biomedical Imaging and  
648 Bioengineering, and through generous contributions from the following: AbbVie, Alzheimer's Association;  
649 Alzheimer's Drug Discovery Foundation; Araclon Biotech; BioClinica, Inc.; Biogen; Bristol-Myers Squibb  
650 Company; CereSpir, Inc.; Eisai Inc.; Elan Pharmaceuticals, Inc.; Eli Lilly and Company; EuroImmun; F.  
651 Hoffmann-La Roche Ltd and its affiliated company Genentech, Inc.; Fujirebio; GE Healthcare; IXICO  
652 Ltd.; Janssen Alzheimer Immunotherapy Research & Development, LLC.; Johnson & Johnson  
653 Pharmaceutical Research & Development LLC.; Lumosity; Lundbeck; Merck & Co., Inc.; Meso Scale  
654 Diagnostics, LLC.; NeuroRx Research; Neurotrack Technologies; Novartis Pharmaceuticals Corporation;  
655 Pfizer Inc.; Piramal Imaging; Servier; Takeda Pharmaceutical Company; and Transition Therapeutics. The  
656 Canadian Institutes of Health Research is providing funds to support ADNI clinical sites in Canada. Private  
657 sector contributions are facilitated by the Foundation for the National Institutes of Health ([www.fnih.org](http://www.fnih.org)).  
658 The grantee organization is the Northern California Institute for Research and Education, and the study is  
659 coordinated by the Alzheimer's Disease Cooperative Study at the University of California, San Diego.  
660 ADNI data are disseminated by the Laboratory for Neuro Imaging at the University of Southern California  
661

## 662 **Author Contributions**

663 J.W.V. and R.O. conceptualized and designed the study. P.S., A.C.E., O.H. and R.O.  
664 supervised the study. J.W.V., N.M., Y.I.M., T.O.S., M.S., P.B., O.H. and R.O. acquired,  
665 processed and analyzed the data. J.W.V., W.F. and R.O. drafted the manuscript. All  
666 authors provide critical or conceptual support and revised the manuscript.

667

## 668 **Potential Conflicts of Interest**

669 OH has acquired research support (for the institution) from Roche, GE  
670 Healthcare, Biogen, AVID Radiopharmaceuticals, Fujirebio, and Euroimmun. In the past  
671 2 years, he has received consultancy/speaker fees (paid to the institution) from Lilly,  
672 Roche, and Fujirebio. Many of these companies are involved in creating tau-PET  
673 radioligands, including AVID, who provided the ligands for this study.

- 674 American Psychiatric Association T (2013): Diagnostic and statistical manual of mental  
675 disorders : DSM-5. Fifth edition. Arlington, VA : American Psychiatric Association,  
676 [2013].
- 677 Arriagada P V, Growdon JH, Hedleywhyte ET, Hyman BT (1992): Neurofibrillary  
678 Tangles But Not Senile Plaques Parallel Duration and Severity of Alzheimers-  
679 Disease. *Neurology* 42:631–639.
- 680 Bejanin A, Schonhaut DR, Joie R La, Kramer JH, Baker SL, Sosa N, Ayakta N, Cantwell  
681 A, Janabi M, Lauriola M, O ’neil JP, Gorno-Tempini ML, Miller ZA, Rosen HJ,  
682 Miller BL, Jagust WJ, Rabinovici GD (2017): Tau pathology and neurodegeneration  
683 contribute to cognitive impairment in Alzheimer’s disease. *Brain* 142:3286–3300.
- 684 Bellec P (2013): Mining the hierarchy of resting-state brain networks: Selection of  
685 representative clusters in a multiscale structure. *Proc - 2013 3rd Int Work Pattern*  
686 *Recognit Neuroimaging, PRNI* 2013:54–57.
- 687 Bellec P, Perlberg V, Jbabdi S, Pélégrini-Issac M, Anton JL, Doyon J, Benali H (2006):  
688 Identification of large-scale networks in the brain using fMRI. *Neuroimage*  
689 29:1231–1243.
- 690 Bellec P, Rosa-Neto P, Lyttelton OC, Benali H, Evans AC (2010): Multi-level bootstrap  
691 analysis of stable clusters in resting-state fMRI. *Neuroimage* 51:1126–1139.
- 692 Braak H, Braak E (1991): Neuropathological staging of Alzheimer-related changes.  
693 *Acta Neuropathol* 82:239–59.
- 694 Chien DT, Bahri S, Szardenings AK, Walsh JC, Mu F, Su M-Y, Shankle WR, Elizarov  
695 A, Kolb HC (2013): Early Clinical PET Imaging Results with the Novel PHF-Tau  
696 Radioligand [F-18]-T807. *J Alzheimer’s Dis* 34:457–468.
- 697 Cho H, Choi JY, Hwang MS, Kim YJ, Lee HM, Lee HS, Lee JH, Ryu YH, Lee MS,  
698 Lyoo CH (2016): In vivo cortical spreading pattern of tau and amyloid in the  
699 Alzheimer’s disease spectrum. *Ann Neurol* 80:247–258.
- 700 Cho H, Choi JY, Lee SH, Lee JH, Choi YC, Ryu YH, Lee MS, Lyoo CH (2017):  
701 Excessive tau accumulation in the parieto-occipital cortex characterizes early-onset  
702 Alzheimer’s disease. *Neurobiol Aging* 53:103–111.
- 703 Choi JY, Cho H, Ahn SJ, Lee JH, Ryu YH, Lee MS, Lyoo CH (2017): “Off-Target” <sup>18</sup>F-  
704 AV-1451 Binding in the Basal Ganglia Correlates with Age-Related Iron  
705 Accumulation. *J Nucl Med* 59:117-120.
- 706 Crane PK, Carle A, Gibbons LE, Insel P, Mackin RS, Gross A, Jones RN, Mukherjee S,  
707 Curtis SM, Harvey D, Weiner M, Mungas D (2012): Development and assessment  
708 of a composite score for memory in the Alzheimer’s Disease Neuroimaging  
709 Initiative (ADNI). *Brain Imaging Behav* 6:502–516.
- 710 Desikan RS, Ségonne F, Fischl B, Quinn BT, Dickerson BC, Blacker D, Buckner RL,  
711 Dale AM, Maguire RP, Hyman BT, Albert MS, Killiany RJ (2006): An automated  
712 labeling system for subdividing the human cerebral cortex on MRI scans into gyral  
713 based regions of interest. *Neuroimage* 31:968–980.
- 714 Dickerson BC, Stoub TR, Shah RC, Sperling RA, Killiany RJ, Albert MS, Hyman BT,  
715 Blacker D, Detolledo-Morrell L (2011): Alzheimer-signature MRI biomarker  
716 predicts AD dementia in cognitively normal adults. *Neurology* 76:1395–1402.
- 717 Farias ST, Mungas D, Reed BR, Cahn-Weiner D, Jagust W, Baynes K, Decarli C (2008):  
718 The measurement of everyday cognition (ECog): scale development and  
719 psychometric properties. *Neuropsychology* 22:531–44.

- 720 Folstein MF, Folstein SE, McHugh PR (1975): “Mini-mental state”. A practical method  
721 for grading the cognitive state of patients for the clinician. *J Psychiatr Res* 12:189–  
722 Fred ALN, Jain AK (2005): Combining Multiple Clusterings Using Evidence  
723 Accumulation. *IEEE Trans Pattern Anal Mach Intell* 27:835–850.
- 724 Frisoni GB, Boccardi M, Barkhof F, Blennow K, Cappa S, Chiotis K, Démonet J-F,  
725 Garibotto V, Giannakopoulos P, Gietl A, Hansson O, Herholz K, Jack CR, Nobili F,  
726 Nordberg A, Snyder HM, Ten Kate M, Varrone A, Albanese E, Becker S, Bossuyt  
727 P, Carrillo MC, Cerami C, Dubois B, Gallo V, Giacobini E, Gold G, Hurst S,  
728 Lönneborg A, Lovblad K-O, Mattsson N, Molinuevo J-L, Monsch AU, Mosimann  
729 U, Padovani A, Picco A, Porteri C, Ratib O, Saint-Aubert L, Scerri C, Scheltens P,  
730 Schott JM, Sonni I, Teipel S, Vineis P, Visser PJ, Yasui Y, Winblad B (2017):  
731 Strategic roadmap for an early diagnosis of Alzheimer’s disease based on  
732 biomarkers. *Lancet Neurol* 16:661–676.
- 733 Garcia-Garcia M, Nikolaidis A, Bellec P, Craddock RC, Cheung B, Castellanos FX,  
734 Milham MP (2018): Detecting stable individual differences in the functional  
735 organization of the human basal ganglia. *Neuroimage* 170:68–82.
- 736 Grothe MJ, Barthel H, Dyrba M, Sabri O, Teipel SJ (2017): In vivo staging of regional  
737 amyloid deposition. *Neurology* 89:2031-2038.
- 738 Hansson O, Grothe MJ, Strandberg TO, Ohlsson T (2017): Tau Pathology Distribution in  
739 Alzheimer’s disease Corresponds Differentially to Cognition-Relevant Functional  
740 Brain Networks. *Front Neurosci* 11.
- 741 Harada R, Ishiki A, Kai H, Sato N, Furukawa K, Furumoto S, Tago T, Tomita N,  
742 Watanuki S, Hiraoka K, Ishikawa Y, Funaki Y, Nakamura T, Yoshikawa T, Iwata R,  
743 Tashiro M, Sasano H, Kitamoto T, Yanai K, Arai H, Kudo Y, Okamura N (2018):  
744 Correlations of (18)F-THK5351 PET with post-mortem burden of tau and  
745 astrogliosis in Alzheimer’s disease. *J Nucl Med* 59:671-674.
- 746 Hoening MC, Bischof GN, Hammes J, Faber J, Fliessbach K, van Eimeren T, Drzezga A  
747 (2017): Tau pathology and cognitive reserve in Alzheimer’s disease. *Neurobiol*  
748 *Aging* 57:1–7.
- 749 Hughes CP, Berg L, Danziger WL, Coben LA, Martin RL (1982): A new clinical scale  
750 for the staging of dementia. *Br J Psychiatry* 140:566–72.
- 751 Ikonomic MD, Abrahamson EE, Price JC, Mathis CA, Klunk WE (2016): [ F-18 ] AV-  
752 1451 PET retention in choroid plexus : more than “ off-target ” binding. *Ann Neurol*  
753 80:307-308.
- 754 Jansen WJ, Ossenkoppele R, Knol DL, Tijms BM, Scheltens P, Verhey FRJ, Visser PJ,  
755 Aalten P, Aarsland D, Alcolea D, Alexander M, Almdahl IS, Arnold SE, Baldeiras I,  
756 Barthel H, van Berckel BNM, Bibeau K, Blennow K, Brooks DJ, van Buchem MA,  
757 Camus V, Cavedo E, Chen K, Chetelat G, Cohen AD, Drzezga A, Engelborghs S,  
758 Fagan AM, Fladby T, Fleisher AS, van der Flier WM, Ford L, Förster S, Fortea J,  
759 Foskett N, Frederiksen KS, Freund-Levi Y, Frisoni GB, Froelich L, Gabryelewicz T,  
760 Gill KD, Gkatzima O, Gómez-Tortosa E, Gordon MF, Grimmer T, Hampel H,  
761 Hausner L, Hellwig S, Herukka S-K, Hildebrandt H, Ishihara L, Ivanoiu A, Jagust  
762 WJ, Johannsen P, Kandimalla R, Kapaki E, Klimkiewicz-Mrowiec A, Klunk WE,  
763 Köhler S, Koglin N, Kornhuber J, Kramberger MG, Van Laere K, Landau SM, Lee  
764 DY, de Leon M, Lisetti V, Lleó A, Madsen K, Maier W, Marcusson J, Mattsson N,  
765 de Mendonça A, Meulenbroek O, Meyer PT, Mintun MA, Mok V, Molinuevo JL,



- 766 Møllergård HM, Morris JC, Mroczko B, Van der Mussele S, Na DL, Newberg A,  
767 Nordberg A, Nordlund A, Novak GP, Paraskevas GP, Parnetti L, Perera G, Peters O,  
768 Popp J, Prabhakar S, Rabinovici GD, Ramakers IHGB, Rami L, Resende de Oliveira  
769 C, Rinne JO, Rodrigue KM, Rodríguez-Rodríguez E, Roe CM, Rot U, Rowe CC,  
770 Rütther E, Sabri O, Sanchez-Juan P, Santana I, Sarazin M, Schröder J, Schütte C,  
771 Seo SW, Soetewey F, Soininen H, Spuru L, Struyfs H, Teunissen CE, Tsolaki M,  
772 Vandenberghe R, Verbeek MM, Villemagne VL, Vos SJB, van Waalwijk van Doorn  
773 LJC, Waldemar G, Wallin A, Wallin ÅK, Wiltfang J, Wolk DA, Zboch M,  
774 Zetterberg H (2015): Prevalence of Cerebral Amyloid Pathology in Persons Without  
775 Dementia: A Meta-analysis. *Jama* 313:1924–1938.
- 776 Johnson KA, Schultz A, Betensky RA, Becker JA, Sepulcre J, Rentz D, Mormino E,  
777 Chhatwal J, Amariglio R, Papp K, Marshall G, Albers M, Mauro S, Pepin L, Alverio  
778 J, Judge K, Philiossaint M, Shoup T, Yokell D, Dickerson B, Gomez-Isla T, Hyman  
779 B, Vasdev N, Sperling R (2016): Tau positron emission tomographic imaging in  
780 aging and early Alzheimer disease. *Ann Neurol* 79:110–119.
- 781 Jones DT, Graff-Radford J, Lowe VJ, Wiste HJ, Gunter JL, Senjem ML, Botha H,  
782 Kantarci K, Boeve BF, Knopman DS, Petersen RC, Jack CR (2017): Tau, Amyloid,  
783 and Cascading Network Failure across the Alzheimer’s disease Spectrum. *Cortex*  
784 97:143–159.
- 785 Kriegeskorte N, Simmons WK, Bellgowan PSF, Baker CI (2009): Circular analysis in  
786 systems neuroscience – the dangers of double dipping. *Nat Neurosci* 12:535–540.
- 787 Landau SM, Harvey D, Madison CM, Koeppe RA, Reiman EM, Foster NL, Weiner MW,  
788 Jagust WJ (2011): Associations between cognitive, functional, and FDG-PET  
789 measures of decline in AD and MCI. *Neurobiol Aging* 32:1207–1218.
- 790 Landau SM, Lu M, Joshi AD, Pontecorvo M, Mintun MA, Trojanowski JQ, Shaw LM,  
791 Jagust WJ (2013): Comparing positron emission tomography imaging and  
792 cerebrospinal fluid measurements of  $\beta$ -amyloid. *Ann Neurol* 74:826–836.
- 793 Lockhart SN, Ayakta N, Winer JR, La Joie R, Rabinovici GD, Jagust WJ (2017):  
794 Elevated (18)F-AV-1451 PET tracer uptake detected in incidental imaging findings.  
795 *Neurology* 88:1095–1097.
- 796 Lowe VJ, Curran G, Fang P, Liesinger AM, Josephs KA, Parisi JE, Kantarci K, Boeve  
797 BF, Pandey MK, Bruinsma T, Knopman DS, Jones DT, Petrucelli L, Cook CN,  
798 Graff-Radford NR, Dickson DW, Petersen RC, Jack CR, Murray ME (2016): An  
799 autoradiographic evaluation of AV-1451 Tau PET in dementia. *Acta Neuropathol*  
800 Commun 4:58.
- 801 Maass A, Landau S, Baker SL, Horng A, Lockhart SN, La R, Rabinovici GD, Jagust WJ,  
802 Initiative N (2017): NeuroImage Comparison of multiple tau-PET measures as  
803 biomarkers in aging and Alzheimer’s disease. *Neuroimage* 157:448–463.
- 804 Maass A, Lockhart SN, Harrison TM, Bell RK, Mellinger T, Swinnerton K, Baker SL,  
805 Rabinovici GD, Jagust WJ (2018): Entorhinal Tau Pathology, Episodic Memory  
806 Decline, and Neurodegeneration in Aging. *J Neurosci* 38:530–543.
- 807 Marquié M, Normandin MD, Vanderburg CR, Costantino IM, Bien EA, Rycyna LG,  
808 Klunk WE, Mathis CA, Ikonomic MD, Debnath ML, Vasdev N, Dickerson BC,  
809 Gomperts SN, Growdon JH, Johnson KA, Frosch MP, Hyman BT, Gómez-Isla T  
810 (2015): Validating novel tau positron emission tomography tracer [F-18]-AV-1451  
811 (T807) on postmortem brain tissue. *Ann Neurol* 78:787–800.



- 812 Marquié M, Siao Tick Chong M, Antón-Fernández A, Verwer EE, Sáez-Calveras N,  
813 Meltzer AC, Ramanan P, Amaral AC, Gonzalez J, Normandin MD, Frosch MP,  
814 Gómez-Isla T (2017): [F-18]-AV-1451 binding correlates with postmortem  
815 neurofibrillary tangle Braak staging. *Acta Neuropathol* 134:619–628.
- 816 Masters CL, Simms G, Weinman NA, Multhaup G, McDonald BL, Beyreuther K (1985):  
817 Amyloid plaque core protein in Alzheimer disease and Down syndrome. *Proc Natl*  
818 *Acad Sci U S A* 82:4245–9.
- 819 McKhann G, Knopman DS, Chertkow H, Hymann B, Jack CR, Kawas C, Klunk W,  
820 Koroshetz W, Manly J, Mayeux R, Mohs R, Morris J, Rossor M, Scheltens P,  
821 Carrillo M, Weintrub S, Phelps C (2011): The diagnosis of dementia due to  
822 Alzheimer’s disease: Recommendations from the National Institute on Aging-  
823 Alzheimer’s Association workgroups on diagnostic guidelines for Alzheimer’s  
824 disease. *Alzheimers Dement* 7:263–269.
- 825 Mishra S, Gordon BA, Su Y, Christensen J, Friedrichsen K, Jackson K, Hornbeck R,  
826 Balota DA, Cairns NJ, Morris JC, Ances BM, Benzinger TLS (2017): AV-1451 PET  
827 imaging of tau pathology in preclinical Alzheimer disease: Defining a summary  
828 measure. *Neuroimage* 161:171–178.
- 829 Mohs RC, Knopman D, Petersen RC, Ferris SH, Ernesto C, Grundman M, Sano M,  
830 Bieliauskas L, Geldmacher D, Clark C, Thal LJ (1997): Development of cognitive  
831 instruments for use in clinical trials of antidementia drugs: additions to the  
832 Alzheimer’s Disease Assessment Scale that broaden its scope. *The Alzheimer’s*  
833 *Disease Cooperative Study. Alzheimer Dis Assoc Disord* 11 Suppl 2:S13-21.
- 834 Nelson P. T. et al (2013): Correlation of Alzheimer Disease Neuropathologic Changes  
835 With Cognitive Status: A Review of the Literature. *J Neuropathol Exp Neurol* 71:  
836 362–381
- 837 Ng KP, Pascoal TA, Mathotaarachchi S, Therriault J, Kang MS, Shin M, Guiot M-C,  
838 Guo Q, Harada R, Comley RA, Massarweh G, Soucy J-P, Okamura N, Gauthier S,  
839 Rosa-Neto P (2017): Monoamine oxidase B inhibitor, selegiline, reduces 18 F-  
840 THK5351 uptake in the human brain. *Alzheimers Res Ther* 9:25.
- 841 Orban P, Doyon J, Petrides M, Mennes M, Hoge R, Bellec P (2015): The Richness of  
842 Task-Evoked Hemodynamic Responses Defines a Pseudohierarchy of Functionally  
843 Meaningful Brain Networks. *Cereb Cortex* 25:2658–2669.
- 844 Ossenkoppele R, Schonhaut DR, Schöll M, Lockhart SN, Ayakta N, Baker SL, O’Neil  
845 JP, Janabi M, Lazaris A, Cantwell A, Vogel J, Santos M, Miller ZA, Bettcher BM,  
846 Vessel KA, Kramer JH, Gorno-Tempini ML, Miller BL, Jagust WJ, Rabinovici GD  
847 (2016): Tau PET patterns mirror clinical and neuroanatomical variability in  
848 Alzheimer’s disease. *Brain* 139:1551–1567.
- 849 Ota K, Oishi N, Ito K, Fukuyama H (2015): Effects of imaging modalities, brain atlases  
850 and feature selection on prediction of Alzheimer’s disease. *J Neurosci Methods*  
851 256:168–183.
- 852 Palmqvist S, Zetterberg H, Mattsson N, Johansson P, Minthon L, Blennow K, Olsson M,  
853 Hansson O (2015): Detailed comparison of amyloid PET and CSF biomarkers for  
854 identifying early Alzheimer disease. *Neurology* 85:1240–1249.
- 855 Pankov A, Binney RJ, Staffaroni AM, Kornak J, Attygalle S, Schuff N, Weiner MW,  
856 Kramer JH, Dickerson BC, Miller BL, Rosen HJ (2016): Data-driven regions of  
857 interest for longitudinal change in frontotemporal lobar degeneration. *NeuroImage*

858 Clin 12:332–340.

859 Pedregosa F, Varoquaux G, Gramfort A, Michel V, Thirion B, Grisel O, Blondel M,  
860 Louppe G, Prettenhofer P, Weiss R, Dubourg V, Vanderplas J, Passos A,  
861 Cournapeau D, Brucher M, Perrot M, Duchesnay É (2012): Scikit-learn: Machine  
862 Learning in Python. *J Mach Learn Res* 12:2825–2830.

863 Pfeffer RI, Kurosaki TT, Harrah CH, Chance JM, Filos S (1982): Measurement of  
864 functional activities in older adults in the community. *J Gerontol* 37:323–9.

865 Rosen WG, Mohs RC, Davis KL (1984): A new rating scale for Alzheimer’s disease. *Am*  
866 *J Psychiatry* 141:1356–1364.

867 Van Rossum IA, Visser PJ, Knol DL, Van Der Flier WM, Teunissen CE, Barkhof F,  
868 Blankenstein MA, Scheltens P (2012): Injury markers but not amyloid markers are  
869 associated with rapid progression from mild cognitive impairment to dementia in  
870 Alzheimer’s disease. *J Alzheimer’s Dis* 29:319–327.

871 Scheltens P, Rockwood K (2011): How golden is the gold standard of neuropathology in  
872 dementia? *Alzheimer’s Dement* 7:486–489.

873 Schöll M, Lockhart SN, Schonhaut DR, O’Neil JP, Janabi M, Ossenkoppele R, Baker SL,  
874 Vogel JW, Faria J, Schwimmer HD, Rabinovici GD, Jagust WJ (2016): PET  
875 Imaging of Tau Deposition in the Aging Human Brain. *Neuron* 89:971–982.

876 Schwarz AJ, Yu P, Miller BB, Shcherbinin S, Dickson J, Navitsky M, Joshi AD, Devous  
877 MD, Mintun MS (2016): Regional profiles of the candidate tau PET ligand <sup>18</sup>F-AV-  
878 1451 recapitulate key features of Braak histopathological stages. *Brain* 139: 1539-  
879 1550

880 Sepulcre J, Grothe MJ, Sabuncu M, Chhatwal J, Schultz AP, Hanseeuw B, El Fakhri G,  
881 Sperling R, Johnson KA (2017): Hierarchical organization of tau and amyloid  
882 deposits in the cerebral cortex. *JAMA Neurol* 74:813.

883 Smith R, Schain M, Nilsson C, Strandberg O, Olsson T, Hägerström D, Jögi J, Borroni E,  
884 Schöll M, Honer M, Hansson O (2016): Increased Basal Ganglia Binding of <sup>18</sup>F-  
885 AV-1451 in Patients With Progressive Supranuclear Palsy. *Mov Disord* 32:108–114.

886 Stern Y (2012): Cognitive reserve in ageing and Alzheimer’s disease. *Lancet Neurol*  
887 11:1006–1012.

888 Xia C, Makarets SJ, Caso C, McGinnis S, Gomperts SN, Sepulcre J, Gomez-Isla T,  
889 Hyman BT, Schultz A, Vasdev N, Johnson KA, Dickerson BC (2017): Association  
890 of In Vivo [<sup>18</sup>F]AV-1451 Tau PET Imaging Results With Cortical Atrophy and  
891 Symptoms in Typical and Atypical Alzheimer Disease. *JAMA Neurol* 74:427.

892 Xia C-F, Arteaga J, Chen G, Gangadharmath U, Gomez LF, Kasi D, Lam C, Liang Q,  
893 Liu C, Mocharla VP, Mu F, Sinha A, Su H, Szardenings AK, Walsh JC, Wang E,  
894 Yu C, Zhang W, Zhao T, Kolb HC (2013): [<sup>18</sup>F]T807, a novel tau positron emission  
895 tomography imaging agent for Alzheimer’s disease. *Alzheimer’s Dement* 9:666–  
896 676.

897

898

899 **TABLES**

900

901 **Table 1: Demographic information, MMSE scores and amyloid-positivity rates**

|                       | Controls          |                   | MCI               |                   | AD                |                   | Total             |                   |
|-----------------------|-------------------|-------------------|-------------------|-------------------|-------------------|-------------------|-------------------|-------------------|
|                       | BioF              | ADNI              | BioF              | ADNI              | BioF              | ADNI              | BioF              | ADNI              |
| <b>n</b>              | 55                | 43                | 21                | 37                | 47                | 10                | 123               | 90                |
| <b>Age (SD)</b>       | <b>75.0 (6.2)</b> | <b>70.3 (5.9)</b> | 70.8 (10.9)       | 72.0 (6.8)        | 70.1 (8.6)        | 73.3 (4.3)        | 72.4 (8.4)        | 71.3 (6.1)        |
| <b>% Male</b>         | 50.9%             | 46.5%             | 57.1%             | 67.6%             | 55.3%             | 60.0%             | 53.7%             | 56.7%             |
| <b>Education (SD)</b> | <b>12.0 (3.7)</b> | <b>16.1 (2.4)</b> | <b>11.7 (3.7)</b> | <b>16.9 (2.7)</b> | <b>12.2 (3.2)</b> | <b>15.0 (3.0)</b> | <b>12.0 (3.5)</b> | <b>16.3 (2.6)</b> |
| <b>% Amyloid+</b>     | 43.6%             | 33.3%             | <b>100%</b>       | <b>44%</b>        | 100%              | 100%              | <b>73.3%</b>      | <b>44.8%</b>      |
| <b>MMSE (SD)</b>      | 29.1 (1.1)        | 29.0 (1.3)        | <b>25.7 (2.8)</b> | <b>28.4 (2.0)</b> | <b>21.2 (5.1)</b> | <b>25.5 (5.1)</b> | <b>25.5 (4.9)</b> | <b>28.3 (2.5)</b> |

902

- \* **BOLD** text indicates significant difference ( $p < 0.05$ ) between cohorts, as measured by t-test, or Fisher's Exact Tests

903

904

- ADNI = Alzheimer's Disease Neuroimaging Initiative; BioF = BioFINDER, MMSE = Mini-Mental State Examination; SD = Standard Deviation

905

906

907 **FIGURES LEGENDS**

908

909 **Figure 1. Mean [ $^{18}\text{F}$ ]AV1451 uptake according to diagnosis, amyloid status and**

910 **cohort**

911 Mean [ $^{18}\text{F}$ ]AV1451 SUVR images stratified by amyloid status and disease stage, across

912 both the ADNI (top) and BioFINDER (bottom) cohorts.

913

914 **Figure 2. Bootstrap analysis of stable clusters on [ $^{18}\text{F}$ ]AV1451 data. [ $^{18}\text{F}$ ]AV1451**

915 scans were entered into a voxelwise clustering algorithm. The optimal solutions were

916 determined using the MSTEPS approach. This resulted in five [ $^{18}\text{F}$ ]AV1451 covariance

917 networks. These networks were masked with a stability threshold of 0.5, and are  
918 displayed in the lower half of the figure.

919

920 **Figure 3. Comparison between data-driven and hypothesis-driven ROIs.** Data-driven  
921 [ $^{18}\text{F}$ ]AV1451 covariance networks were compared to previously existing Braak Stage  
922 ROIs from the literature using descriptive statistics. The clusters were compared to ROIs  
923 from Schöll, Lockhart et al. and Cho et al using Normalized Mutual Information (top  
924 left), and were compared to regions from Schwarz et al. using the percentage of Schwarz  
925 ROI voxels within each data-driven cluster.

926

927 **Figure 4. Associations between [ $^{18}\text{F}$ ]AV1451 ROIs and global cognition.** General  
928 linear models comparing [ $^{18}\text{F}$ ]AV1451 signal to Global Cognition composite scores were  
929 run, adjusting for age, sex and education. For each model, a different [ $^{18}\text{F}$ ]AV1451 ROI  
930 was used. ROIs included the five clusters identified in our analysis, as well as Braak  
931 stage regions taken from three different papers: Schöll, Lockhart et al., 2016 *Neuron*; Cho  
932 et al., 2016 *Ann. Neurol.*; Schwarz et al., 2016 *Brain*. Two versions of each Braak ROI  
933 were created, one using regions from that stage only (e.g. Stage 3), and one combining all  
934 regions from that stage with all regions from previous stages (e.g. Stage 1+2+3). The  
935 effect size (t-value) of each tau ROI is shown. [ $^{18}\text{F}$ ]AV1451 binding in several ROIs  
936 demonstrated strong relationships with Global Cognition, though only the data-driven  
937 Temporo-parietal region survived multiple comparisons.

938

939 **Figure 5. Cumulative ranking of ROI performance across all measures of global**  
940 **cognition and function.** For each measure of global cognition, [ $^{18}\text{F}$ ]AV1451 ROIs were  
941 ranked from worst to best (such that the worst region would have rank of 1) with respect  
942 to the effect size of the association between [ $^{18}\text{F}$ ]AV1451 in that region and the cognitive  
943 score. The ranks were then summed across all cognitive measurements and are displayed  
944 here. The data-driven Cluster 4 (“Temporo-parietal”) ranked the best cumulatively across  
945 cognitive tests, with the data-driven Cluster 3 (“Medial/Inferior/Anterior temporal”)   
946 ranking second best.

947

948 **Figure 6. Lasso regression selects most important features related to cognition.** All  
949 [ $^{18}\text{F}$ ]AV1451 ROIs plus age, sex and education were entered into a L1-penalized Lasso  
950 regression feature selection routine with the Global Cognitive composite score as the  
951 dependent variable. The Lasso selected education and two ROIs: the data-driven  
952 Temporo-parietal region, and the Schwarz Single VI region. Together in a general linear  
953 model, these features explained 28% of the variance in the Global Cognition score.

954

955 **Figure 7. Assessing reproducibility of clusters across cohorts.** BASC clustering was  
956 performed on ADNI [ $^{18}\text{F}$ ]AV1451 data and was compared to the original clustering  
957 solution from BioFINDER data. Panel **A.** represents the surface rendering of voxels that  
958 shared the same cluster in both BioFINDER and ADNI solutions. Each cluster is  
959 represented as a different color. Panel **B.** shows the dice coefficients representing the  
960 correspondence between similar clusters in the BioFINDER and ADNI samples. The left  
961 graph represents correspondence across the whole brain, while the right graph represents

962 correspondence between clusters within BioFINDER cluster-core masks. RI = adjusted

963 Rand index; AMI = adjusted mutual information score

964

965

966

967

968

969

970

971

972

973

974

975

976

977

978

979

980

981

982

983

984

985

986

987

988

989

990

991

992

993

994

995

996

997

998

999

1000

1001

1002

1003

1004

1005

1006 **FIGURES**

1007 **Figure 1**

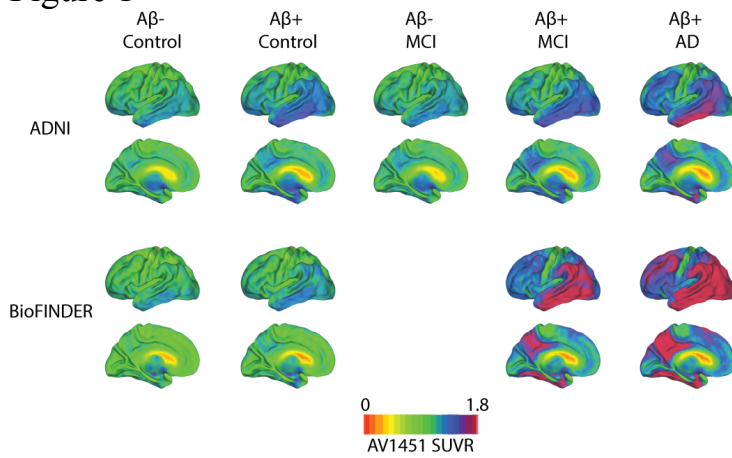

1008

1009

1010 **Figure 2**

1011

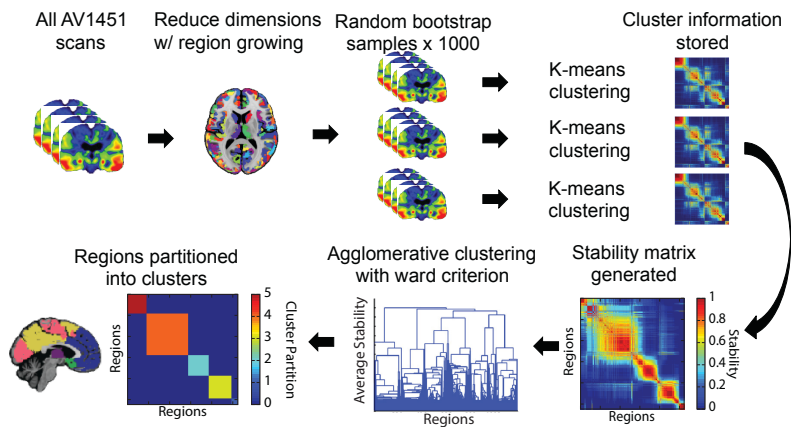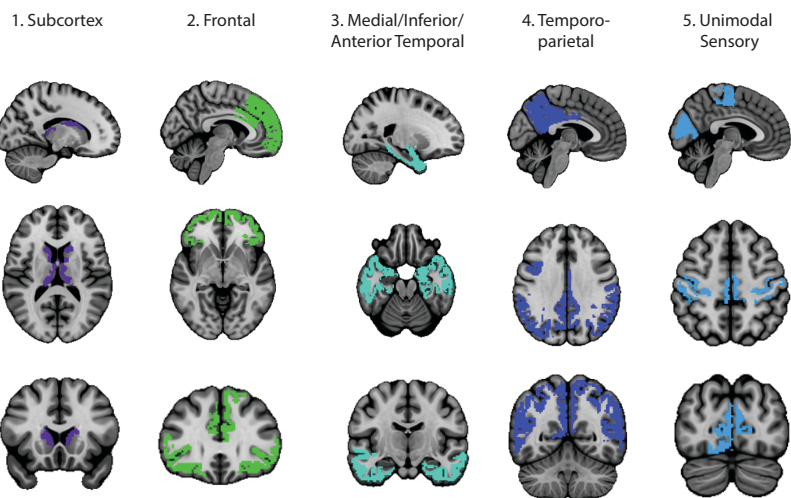

1012



1013 Figure 3

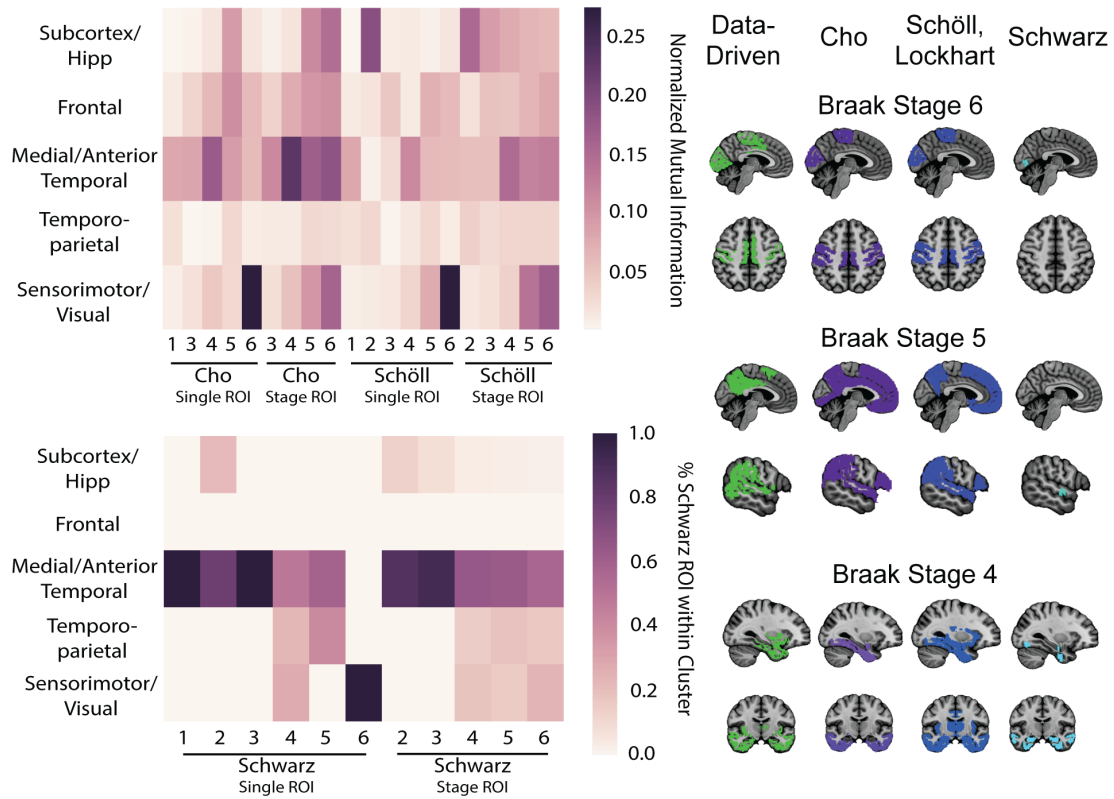

1014  
1015 Figure 4  
1016

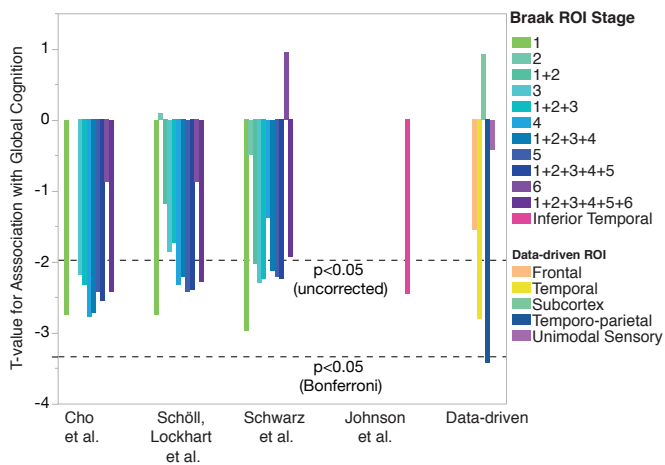

1017  
1018  
1019  
1020  
1021



1022 Figure 5

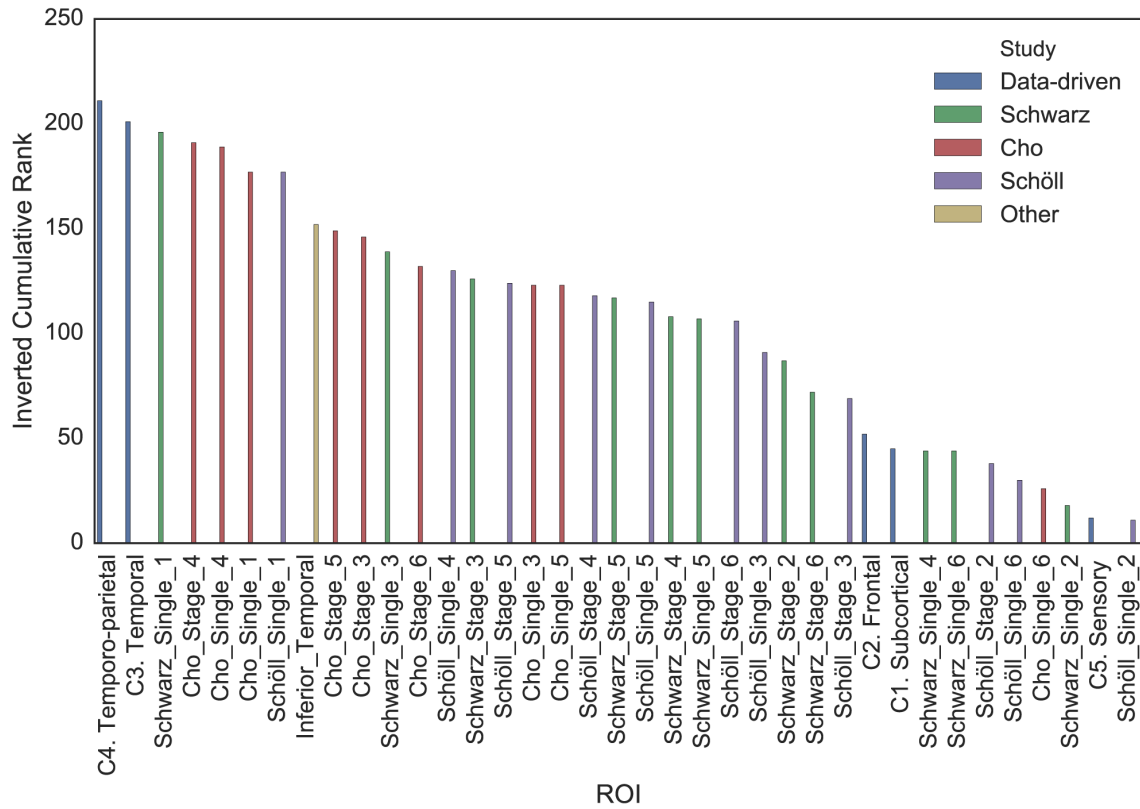

1023

1024 Figure 6

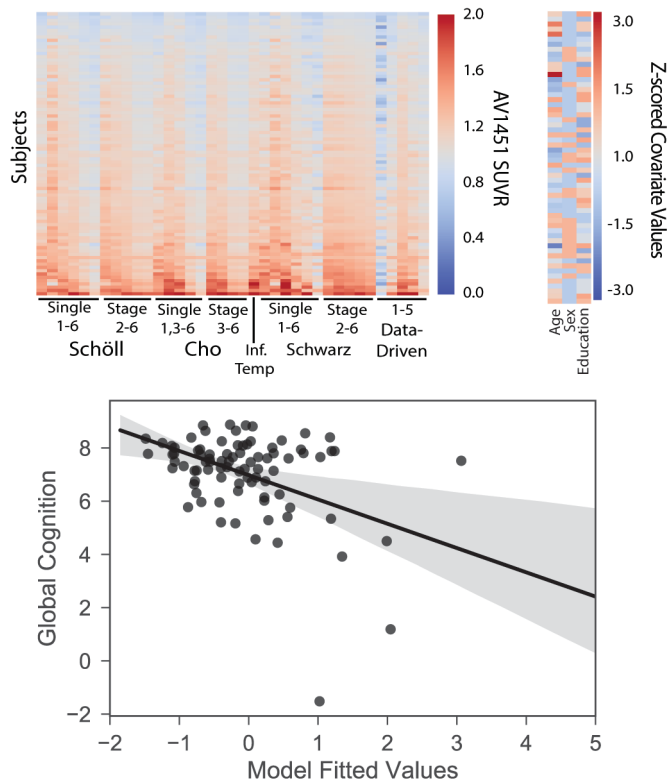

1025

1026  
1027

**Figure 7**

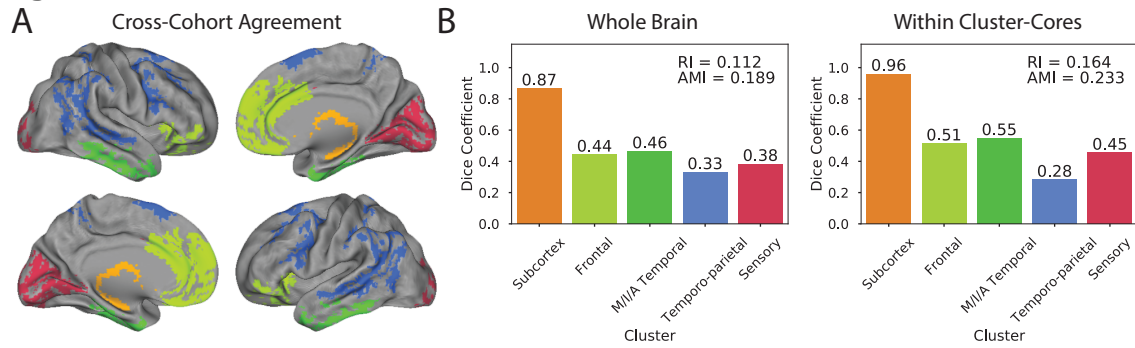

1028  
1029  
1030  
1031  
1032  
1033  
1034  
1035  
1036  
1037  
1038  
1039  
1040  
1041  
1042  
1043  
1044  
1045  
1046  
1047  
1048  
1049  
1050  
1051  
1052  
1053  
1054  
1055  
1056  
1057  
1058  
1059  
1060  
1061  
1062

1063

1064 **SUPPLEMENTARY**

1065

1066 **Table S1. Best-ranking [<sup>18</sup>F]AV1451 ROIs at describing global cognition across**

1067 **different cognitive tests**

| MMSE |             |                   |        | CDRSB       |                  |        |
|------|-------------|-------------------|--------|-------------|------------------|--------|
| Rank | Study       | ROI               | t      | Study       | ROI              | t      |
| 1    | Data-driven | Temporo-parietal  | -2.45* | Schwarz     | Stage I          | 3.60** |
| 2    | Data-driven | Temporal          | -2.00* | Data-driven | Temporo-parietal | 3.49** |
| 3    | Cho         | Single IV         | -1.97  | Cho/Scholl  | Stage I          | 3.49** |
| 4    | Cho         | Stage IV          | -1.83  | Data-driven | Temporal         | 3.33** |
| 5    | Other       | Inferior Temporal | -1.80  | Cho         | Stage IV         | 3.18*  |

| ADAS11 |             |                  |        | ADAS13      |                  |       |
|--------|-------------|------------------|--------|-------------|------------------|-------|
| Rank   | Study       | ROI              | t      | Study       | ROI              | t     |
| 1      | Data-driven | Temporo-parietal | 4.10** | Data-driven | Temporo-parietal | 3.02* |
| 2      | Schwarz     | Stage I          | 3.50** | Schwarz     | Stage I          | 2.57* |
| 3      | Cho         | Single IV        | 3.43** | Data-Driven | Temporal         | 2.35* |
| 4      | Data-driven | Temporal         | 3.39** | Cho/Scholl  | Stage I          | 2.34* |
| 5      | Cho         | Stage IV         | 3.33** | Cho         | Single IV        | 2.34* |

| ECOG |             |                  |        | FAQ         |                  |       |
|------|-------------|------------------|--------|-------------|------------------|-------|
| Rank | Study       | ROI              | t      | Study       | ROI              | t     |
| 1    | Data-driven | Temporo-parietal | 3.68** | Schwarz     | Stage I          | 2.91* |
| 2    | Cho         | Stage IV         | 3.48** | Data-driven | Temporal         | 2.69* |
| 3    | Schwarz     | Stage I          | 3.40** | Cho/Scholl  | Stage I          | 2.68* |
| 4    | Cho         | Single IV        | 3.40** | Data-driven | Temporo-parietal | 2.67* |
| 5    | Data-Driven | Temporal         | 3.40** | Cho         | Stage III        | 2.63* |

1068 \* p<0.05 \*\* p[Bonf.]<0.05

1069 ROI = Region of Interest; MMSE = Mini-Mental State Examination; CDRSB = Clinical

1070 Dementia Rating Sum of Boxes; ADAS = Alzheimer's disease Assessment Scale; ECog

1071 = Everyday Cognition; FAQ = Functional Activities Questionnaire

1072

1073

1074

1075

1076

1077 **Table S2. Best-ranking [<sup>18</sup>F]AV1451 ROIs at describing episodic memory**

| ADNI_MEM |             |                  |        |
|----------|-------------|------------------|--------|
| Rank     | Study       | ROI              | t      |
| 1        | Schwarz     | Stage I          | -3.27* |
| 2        | Cho/Schöll  | Stage I          | -2.99* |
| 3        | Data-driven | Temporo-parietal | -2.85* |
| 4        | Schwarz     | Stage II         | -2.58* |
| 5        | Cho         | Stage III        | -2.54* |

1078 \* p<0.05, \*\* p[Bonf.]<0.05

1079

1080

1081 **Table S3. Fitted values from the General Linear Model comparing selected [<sup>18</sup>F]AV1451**

1082 **ROIs to Global Cognition composite also explains variance in individual cognitive tests.**

| Test   | R <sup>2</sup> |
|--------|----------------|
| CDRSB  | 0.214          |
| ADAS11 | 0.261          |
| ADAS13 | 0.215          |
| FAQ    | 0.221          |
| ECog   | 0.196          |
| MMSE   | 0.219          |

1083 MMSE = Mini-Mental State Examination; CDRSB = Clinical Dementia Rating Sum of

1084 Boxes; ADAS = Alzheimer's disease Assessment Scale; ECog = Everyday Cognition;

1085 FAQ = Functional Activities Questionnaire

1086

1087

1088

1089

1090

1091

1092

1093

1094

1095

1096

1097

1098

1099

1100

1101

1102

1103 **Table S4. Variables selected by Lasso regression that optimally described global cognition across different cognitive tests**

| <b>MMSE</b>  |                  | <b>CDRSB</b> |                  | <b>ADAS11</b> |                  |
|--------------|------------------|--------------|------------------|---------------|------------------|
| <b>Study</b> | <b>ROI</b>       | <b>Study</b> | <b>ROI</b>       | <b>Study</b>  | <b>ROI</b>       |
| Data-driven  | Temporo-parietal | Data-driven  | Temporo-parietal | Data-driven   | Temporo-parietal |
| Data-driven  | Subcortical      |              |                  | Schwarz       | Single VI        |
| Schwarz      | Stage VI         |              |                  | Schwarz       | Stage I          |
| Demographic  | Education        |              |                  | Demographic   | Education        |

  

| <b>ADAS13</b> |                  | <b>ECOG</b>  |                  | <b>FAQ</b>   |                  |
|---------------|------------------|--------------|------------------|--------------|------------------|
| <b>Study</b>  | <b>ROI</b>       | <b>Study</b> | <b>ROI</b>       | <b>Study</b> | <b>ROI</b>       |
| Data-driven   | Temporo-parietal | Data-driven  | Temporo-parietal | Data-driven  | Temporo-parietal |
| Schwarz       | Single VI        |              |                  | Schwarz      | Single VI        |
| Schwarz       | Stage I          |              |                  | Schwarz      | Stage I          |
| Schöll        | Single II        |              |                  | Demographic  | Education        |
| Demographic   | Education        |              |                  |              |                  |
| Demographic   | Age              |              |                  |              |                  |

1104

1105

1106 MMSE = Mini-Mental State Examination; CDRSB = Clinical Dementia Rating Sum of Boxes; ADAS = Alzheimer's disease

1107 Assessment Scale; ECog = Everyday Cognition; FAQ = Functional Activities Questionnaire

1108

1109

1110

1111

1112

1113

1114

1115

1116 **Table S5. Disparities in Braak stage regions-of-interests across studies**

| <b>Brain Region</b>      | <b>Schöll,<br/>Lockhart et<br/>al.</b> | <b>Cho et al.</b> | <b>Schwarz et al.</b> | <b>Data-driven</b> |
|--------------------------|----------------------------------------|-------------------|-----------------------|--------------------|
| <b>Hippocampus</b>       | Included                               | Not included      | Head only             | Head only          |
| <b>Lingual Gyrus</b>     | Stage 3                                | Stage 5           | Stage 6               | TP/US              |
| <b>Thalamus</b>          | Stage 4                                | Not included      | Not Included          | SCN                |
| <b>Putamen</b>           | Stage 5                                | Not included      | Not Included          | MAIT               |
| <b>Lateral Occipital</b> | Stage 5                                | Stage 5           | Stage 4               | TP/US              |
| <b>PCC</b>               | Stage 4                                | Stage 5           | Not Included          | TP                 |
| <b>Insula</b>            | Stage 4                                | Stage 5           | Not Included          | MAIT               |
| <b>Frontal Lobe</b>      | All stage 5                            | All stage 5       | Not Included          | F/TP               |

1117

1118 TP = Temporo-parietal; US = Unimodal Sensory; SCN = Subcortical/Noise; MAIT =

1119 Medial/Anterior/Inferior Temporal; F = Frontal

1120

1121

1122 **Supplementary Figures**

1123 **Figure S1**

5 Cluster Solution

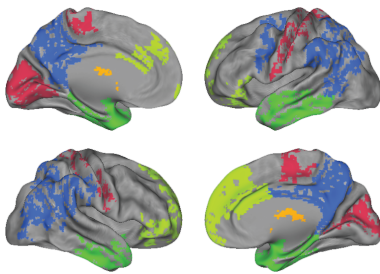

9 Cluster Solution

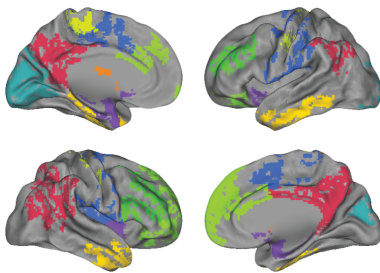

32 Cluster Solution

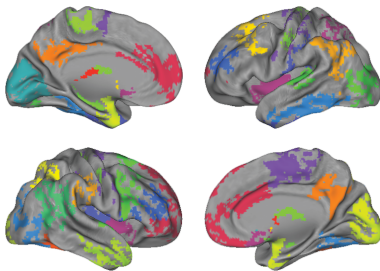

1124

1125 **Figure S1:** BASC was run on 123 [ $^{18}\text{F}$ ]AV1451 images from the BioFINDER cohort.  
1126 MSTEPS suggested three different resolutions ( $k=5$ ,  $k=9$  and  $k=32$ ) to capture the  
1127 stable patterns of covariance across multiple resolutions. Cluster-core maps were  
1128 created by setting voxels with cluster stability  $<0.5$  to 0. The cluster-cores from  
1129 these three solutions are projected onto a cortical surface.

1130  
1131

**Figure S2**

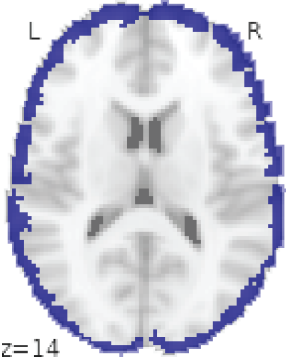

1132  $z=14$   
1133 **Figure S2:** When running BASC in ADNI, a cluster emerged that uniformly  
1134 surrounded the cerebral cortex, likely representing partial volume effects that could  
1135 be driven by cortical atrophy in older, amyloid-negative subjects.
